# Supplementary material for: Inverse modeling of the Chernobyl source term using atmospheric concentration and deposition measurements
Source: Copernicus journal article supplement (doi:10.5194/acp-17-8805-2017), 2017-07-20
Supplement: Supplementary file 1 [file Posterior_emissions.xlsx]

## Sheet: Posterior releases
INITIAL RELEASE DATE	INITIAL COORDINATES		INITIAL ALTITUDE	Cesium-134 (kilograms per timestep)				Cesium-137 (kilograms per timestep)				Iodine-131 (kilograms per timestep)				FINAL RELEASE DATE	FINAL COORDINATES		FINAL ALTITUDE
yyyy1 mm1 dd1 hh1 mi1 ss1	lat1	lon1	Meters	SIZE 1	SIZE 2	SIZE 3	SIZE 4	SIZE 1	SIZE 2	SIZE 3	SIZE 4	SIZE 1	SIZE 2	SIZE 3	SIZE 4	yyyy2 mm2 dd2 hh2 mi2 ss2	lat2	lon2	Meters
1986-04-26	51.3888	30.0988	0	0	3.88138e-06	3.38897e-11	0	0	1.17552	0	0	0	0	0	0	1986-04-26 03:00:00	51.3888	30.0988	500
1986-04-26	51.3888	30.0988	500	8.19844e-05	7.71989e-06	6.77448e-11	0	0	0	0	0	0	0	0	0	1986-04-26 03:00:00	51.3888	30.0988	1000
1986-04-26	51.3888	30.0988	1000	0.0168591	0.00507449	0.00675068	1.14899e-05	0.00952828	0.354018	0.0714278	0.000626714	0.000464909	0.000284617	0.00221186	0.000806082	1986-04-26 03:00:00	51.3888	30.0988	1500
1986-04-26	51.3888	30.0988	1500	2.95619e-05	0.00405006	0.00537995	2.48039e-05	0.0118998	0.117425	0.168628	0.00109945	0.000348294	6.30812e-05	0.0017906	0.000664359	1986-04-26 03:00:00	51.3888	30.0988	2000
1986-04-26	51.3888	30.0988	2000	9.13988e-06	0.00104728	0.00137165	0.0018072	0.00870814	0.0372614	0.0650287	0.0148996	0.00016845	0.000349046	0.000442281	0.00015618	1986-04-26 03:00:00	51.3888	30.0988	2500
1986-04-26	51.3888	30.0988	2500	0	2.17873e-05	2.02127e-10	0.0326245	1.20142	0.00453057	1.65611	0.137237	0	0	0	0	1986-04-26 03:00:00	51.3888	30.0988	3000
1986-04-26 03:00:00	51.3888	30.0988	0	0	2.47664e-05	2.3529e-10	0	0	0.0915934	0	0	0	0	0	0	1986-04-26 06:00:00	51.3888	30.0988	500
1986-04-26 03:00:00	51.3888	30.0988	500	0	2.74436e-05	2.68213e-10	0	0	0	0	0	0	0	0	0	1986-04-26 06:00:00	51.3888	30.0988	1000
1986-04-26 03:00:00	51.3888	30.0988	1000	0.000142166	0.00509279	0.00675068	0.000171517	0.000342385	0.000467438	0.000986432	0.0254475	0.000109561	0.0001121	0.00221186	0.000586578	1986-04-26 06:00:00	51.3888	30.0988	1500
1986-04-26 03:00:00	51.3888	30.0988	1500	0.0347061	0.00406668	0.00537995	0.000133732	0.00909637	0.000771193	0.0244316	0.0230194	3.67563e-05	5.48135e-05	0.0017906	0.000407538	1986-04-26 06:00:00	51.3888	30.0988	2000
1986-04-26 03:00:00	51.3888	30.0988	2000	3.98512e-05	0.00106197	0.00137165	1.81474e-06	0.00205185	2.54048	0.00694998	0.000227236	1.12868e-05	2.25713e-05	0.000442281	7.54798e-05	1986-04-26 06:00:00	51.3888	30.0988	2500
1986-04-26 03:00:00	51.3888	30.0988	2500	0	3.42782e-05	3.96805e-10	0.0269995	0	0	0	0	0	0	0	0	1986-04-26 06:00:00	51.3888	30.0988	3000
1986-04-26 06:00:00	51.3888	30.0988	0	0	3.48029e-05	4.28009e-10	0	0	0	0	0	0	0	0	0	1986-04-26 09:00:00	51.3888	30.0988	500
1986-04-26 06:00:00	51.3888	30.0988	500	0	3.47672e-05	4.58769e-10	0	0	0	0	0	0	0	0	0	1986-04-26 09:00:00	51.3888	30.0988	1000
1986-04-26 06:00:00	51.3888	30.0988	1000	0.000156806	0.00509716	0.00675068	4.85917e-05	0.000202113	0.069871	0.00141588	0.000207913	2.74583e-05	8.25257e-06	0.00221186	0.000197247	1986-04-26 09:00:00	51.3888	30.0988	1500
1986-04-26 06:00:00	51.3888	30.0988	1500	0.000399059	0.00406789	0.00537995	8.33097e-05	0.000238394	0.0567406	0.00043685	0.000407574	8.59096e-07	5.89902e-05	0.0017906	0.000177436	1986-04-26 09:00:00	51.3888	30.0988	2000
1986-04-26 06:00:00	51.3888	30.0988	2000	0.000102336	0.00105986	0.00137165	2.32827e-05	0.00088926	0.014004	0.00464703	7.49411e-05	9.26088e-06	2.4518e-05	0.000442281	4.12641e-06	1986-04-26 09:00:00	51.3888	30.0988	2500
1986-04-26 06:00:00	51.3888	30.0988	2500	0.00306944	2.87455e-05	5.76734e-10	0	0	0	0	0	0	0	0	0	1986-04-26 09:00:00	51.3888	30.0988	3000
1986-04-26 09:00:00	51.3888	30.0988	0	0	2.58198e-05	6.04806e-10	0	0	3.40159e-30	0	0	0	0	0	0	1986-04-26 12:00:00	51.3888	30.0988	500
1986-04-26 09:00:00	51.3888	30.0988	500	0	2.23924e-05	6.32253e-10	0	0	9.29814e-41	0	0	0	0	0	6.95045e-07	1986-04-26 12:00:00	51.3888	30.0988	1000
1986-04-26 09:00:00	51.3888	30.0988	1000	7.47051e-05	0.00508157	0.00675068	2.20624e-05	5.23893e-05	0.1166	0.00086118	0.000207273	0.000580976	0.000847873	0.00221186	0.000786684	1986-04-26 12:00:00	51.3888	30.0988	1500
1986-04-26 09:00:00	51.3888	30.0988	1500	2.88351e-05	0.00404941	0.00537995	0.000166283	2.93043e-05	0.094479	0.0006059	9.17346e-05	0.000577036	0.000846704	0.0017906	0.000674604	1986-04-26 12:00:00	51.3888	30.0988	2000
1986-04-26 09:00:00	51.3888	30.0988	2000	1.76355e-05	0.00103899	0.00137165	2.30571e-05	0.00215156	0.02333	0.00657108	9.8205e-05	0.000154397	6.65361e-05	0.000442281	0.000154925	1986-04-26 12:00:00	51.3888	30.0988	2500
1986-04-26 09:00:00	51.3888	30.0988	2500	0.00193959	6.21102e-06	7.35312e-10	0	0	0	0	0	0	0	0	0	1986-04-26 12:00:00	51.3888	30.0988	3000
1986-04-26 12:00:00	51.3888	30.0988	0	0	2.56296e-06	7.59292e-10	0	0	0	0	0	0	0	0	3.77261e-05	1986-04-26 15:00:00	51.3888	30.0988	500
1986-04-26 12:00:00	51.3888	30.0988	500	0	0	7.82524e-10	0	0	0	0	0	0	0	0	3.23554e-05	1986-04-26 15:00:00	51.3888	30.0988	1000
1986-04-26 12:00:00	51.3888	30.0988	1000	0.00022108	0.00506173	0.00675068	9.51938e-05	0.000133804	0.1166	0.00168638	0.000143291	0.000712408	0.001374	0.00221186	0.000844305	1986-04-26 15:00:00	51.3888	30.0988	1500
1986-04-26 12:00:00	51.3888	30.0988	1500	0.000132053	0.00403378	0.00537995	0.000120475	0.000164842	0.094479	0.000945691	0.000405448	0.000539624	0.000325105	0.0017906	0.000691914	1986-04-26 15:00:00	51.3888	30.0988	2000
1986-04-26 12:00:00	51.3888	30.0988	2000	3.82665e-05	0.00102839	0.00137165	3.83994e-05	9.63707e-05	0.02333	0.000197339	1.91704e-05	6.19509e-06	6.56924e-05	0.000442281	0.000175377	1986-04-26 15:00:00	51.3888	30.0988	2500
1986-04-26 12:00:00	51.3888	30.0988	2500	0	7.65332e-07	8.67714e-10	0	0	0	0	0	0	0	0	1.55998e-05	1986-04-26 15:00:00	51.3888	30.0988	3000
1986-04-26 15:00:00	51.3888	30.0988	0	0.00642069	1.72651e-06	8.87019e-10	0.0390505	0	0	0	0	0	0	0	3.63541e-05	1986-04-26 18:00:00	51.3888	30.0988	500
1986-04-26 15:00:00	51.3888	30.0988	500	0	2.29574e-06	9.05508e-10	0	0	0	0	0	3.45031e-05	0.000192245	0	6.23346e-05	1986-04-26 18:00:00	51.3888	30.0988	1000
1986-04-26 15:00:00	51.3888	30.0988	1000	9.08425e-05	0.00506539	0.00675068	0.000405315	0.0004432	0.1166	0.000304099	0.0070012	0.000780104	0.00111121	0.00221186	0.000863269	1986-04-26 18:00:00	51.3888	30.0988	1500
1986-04-26 15:00:00	51.3888	30.0988	1500	0.000972475	0.00403705	0.00537995	0.00222634	0.000316142	0.094479	0.000806444	0.00871848	0.000642907	0.00138805	0.0017906	0.000701412	1986-04-26 18:00:00	51.3888	30.0988	2000
1986-04-26 15:00:00	51.3888	30.0988	2000	0.0163934	0.00103029	0.00137165	0.000373197	2.46166e-05	0.02333	0.000196231	0.00339224	9.27192e-05	3.41879e-06	0.000442281	0.000184793	1986-04-26 18:00:00	51.3888	30.0988	2500
1986-04-26 15:00:00	51.3888	30.0988	2500	0.000438137	9.08537e-07	9.71131e-10	0	0	0	0	0	0	0	0	1.48529e-05	1986-04-26 18:00:00	51.3888	30.0988	3000
1986-04-26 18:00:00	51.3888	30.0988	0	0	2.68919e-07	9.85416e-10	0	0	0	0	0	0	0	0	0	1986-04-26 21:00:00	51.3888	30.0988	500
1986-04-26 18:00:00	51.3888	30.0988	500	0	0	9.9884e-10	0	0	0	0	0	0	0	0	2.26997e-05	1986-04-26 21:00:00	51.3888	30.0988	1000
1986-04-26 18:00:00	51.3888	30.0988	1000	0.000203486	0.00506268	0.00675068	0.000100537	0.000159266	0.1166	0.000212667	0.0323029	0.000820197	0.00118627	0.00221186	0.000960193	1986-04-26 21:00:00	51.3888	30.0988	1500
1986-04-26 18:00:00	51.3888	30.0988	1500	8.27223e-06	0.00403472	0.00537995	0.000171791	8.44283e-05	0.094479	0.000528131	0.0415866	0.000707279	0.00129037	0.0017906	0.000760178	1986-04-26 21:00:00	51.3888	30.0988	2000
1986-04-26 18:00:00	51.3888	30.0988	2000	3.00366e-05	0.00102869	0.00137165	8.04767e-06	7.74789e-05	0.02333	0.00543864	0.0126362	0.000229782	0.00052875	0.000442281	0.000228748	1986-04-26 21:00:00	51.3888	30.0988	2500
1986-04-26 18:00:00	51.3888	30.0988	2500	0	1.41833e-07	1.04381e-09	0	0	0	0	0.000614183	6.27724e-05	0	0	2.6019e-05	1986-04-26 21:00:00	51.3888	30.0988	3000
1986-04-26 21:00:00	51.3888	30.0988	0	3.38085e-06	0.000227024	0.000302425	9.8758e-06	0.000840772	0.00521062	0.00125241	2.01684e-05	2.82848e-06	6.18226e-06	9.82721e-05	9.37251e-07	1986-04-27	51.3888	30.0988	500
1986-04-26 21:00:00	51.3888	30.0988	500	3.57834e-05	0.00110806	0.00147718	0	0.000557788	0.0264394	0.000278988	0.000635097	0.000116807	2.77508e-05	0.000491483	5.90951e-06	1986-04-27	51.3888	30.0988	1000
1986-04-26 21:00:00	51.3888	30.0988	1000	5.95993e-05	0.00258438	0.00344571	4.66507e-05	0.000244131	0.0598574	0.000257096	0.00546222	5.63473e-06	7.12641e-06	0.00113032	0.000289829	1986-04-27	51.3888	30.0988	1500
1986-04-26 21:00:00	51.3888	30.0988	1500	4.99555e-05	0.00134476	0.00179303	4.68036e-05	5.76059e-05	0.031488	0.000290233	4.53754e-05	5.80231e-05	5.75242e-06	0.00059677	0.000278876	1986-04-27	51.3888	30.0988	2000
1986-04-26 21:00:00	51.3888	30.0988	2000	5.22709e-06	0.000342748	0.000457143	8.62788e-06	0	0.00777543	7.1214e-05	7.16354e-07	1.59764e-05	0.000418573	0.000147403	0.000195284	1986-04-27	51.3888	30.0988	2500
1986-04-26 21:00:00	51.3888	30.0988	2500	0	0	1.08462e-09	0	0	0	0	0	0.0002384	0.000756898	0	0.000102081	1986-04-27	51.3888	30.0988	3000
1986-04-27	51.3888	30.0988	0	0.000268154	0.000340065	0.000453601	1.0959e-05	0.0386727	0.0078153	0.104624	1.52877e-05	2.05313e-06	4.31044e-05	0.000147396	3.57535e-06	1986-04-27 03:00:00	51.3888	30.0988	500
1986-04-27	51.3888	30.0988	500	0.00155103	0.00166163	0.0022156	4.98719e-05	0.0018824	0.039656	0.00282768	3.21869e-05	1.10366e-05	1.36574e-05	0.000737166	1.97295e-05	1986-04-27 03:00:00	51.3888	30.0988	1000
1986-04-27	51.3888	30.0988	1000	0.000449883	0.00134521	0.00179362	5.09441e-05	0.0165058	0.031493	0.0458273	7.87112e-05	5.9783e-06	2.94788e-07	0.000589678	3.98474e-06	1986-04-27 03:00:00	51.3888	30.0988	1500
1986-04-27	51.3888	30.0988	1500	0	2.63531e-08	1.09379e-09	0.0660084	0	0	0	0	0	0	0	0	1986-04-27 03:00:00	51.3888	30.0988	2000
1986-04-27	51.3888	30.0988	2000	0	0	1.09382e-09	0	0	0	0	0	0	0	0	0	1986-04-27 03:00:00	51.3888	30.0988	2500
1986-04-27	51.3888	30.0988	2500	0	0	1.09295e-09	0	0	0	0	0	0	0	0	6.91078e-05	1986-04-27 03:00:00	51.3888	30.0988	3000
1986-04-27 03:00:00	51.3888	30.0988	0	3.23999e-06	0.000339947	0.000453601	1.52614e-06	2.65128e-05	0.0078153	8.04501e-05	2.72546e-05	8.27171e-07	4.03949e-06	0.000147397	3.97956e-06	1986-04-27 06:00:00	51.3888	30.0988	500
1986-04-27 03:00:00	51.3888	30.0988	500	0.00167962	0.00166126	0.0022156	3.39957e-05	7.12691e-05	0.039656	0.000304391	0.00446444	4.42443e-06	4.30644e-06	0.000737166	1.72084e-05	1986-04-27 06:00:00	51.3888	30.0988	1000
1986-04-27 03:00:00	51.3888	30.0988	1000	0.0096295	0.00134458	0.00179362	8.05058e-06	4.87998e-05	0.031493	0.000104631	0.0103826	5.74531e-06	9.43794e-06	0.000589678	3.0351e-06	1986-04-27 06:00:00	51.3888	30.0988	1500
1986-04-27 03:00:00	51.3888	30.0988	1500	2.31493e-05	0	1.08042e-09	0	0.00333506	0	0.00908651	0.0489551	0	0	0	0	1986-04-27 06:00:00	51.3888	30.0988	2000
1986-04-27 03:00:00	51.3888	30.0988	2000	0	0	1.07505e-09	0	0	0	0	0.00432922	0	0	0	0	1986-04-27 06:00:00	51.3888	30.0988	2500
1986-04-27 03:00:00	51.3888	30.0988	2500	0	0	1.06878e-09	0	0	0	0	0	0	0.000231776	0	0	1986-04-27 06:00:00	51.3888	30.0988	3000
1986-04-27 06:00:00	51.3888	30.0988	0	5.57349e-06	0.00033888	0.000453601	1.25109e-05	1.93171e-05	0.0078153	2.58395e-05	2.77043e-05	7.74501e-05	8.27798e-06	0.000147397	1.29584e-05	1986-04-27 09:00:00	51.3888	30.0988	500
1986-04-27 06:00:00	51.3888	30.0988	500	4.16238e-05	0.00166028	0.0022156	2.92066e-05	0.000346764	0.039656	0.0009813	2.4375e-05	8.66029e-06	2.614e-05	0.000737166	0.000102278	1986-04-27 09:00:00	51.3888	30.0988	1000
1986-04-27 06:00:00	51.3888	30.0988	1000	1.95641e-05	0.00134375	0.00179362	3.87315e-05	8.4387e-05	0.031493	0.000165197	2.51059e-05	0.000108987	3.02692e-05	0.000589678	0.000133214	1986-04-27 09:00:00	51.3888	30.0988	1500
1986-04-27 06:00:00	51.3888	30.0988	1500	0	0	1.03488e-09	0	0	0	0	0	0	0	0	0	1986-04-27 09:00:00	51.3888	30.0988	2000
1986-04-27 06:00:00	51.3888	30.0988	2000	0	0	1.02423e-09	0	0	0	0	0	0	0	0	0	1986-04-27 09:00:00	51.3888	30.0988	2500
1986-04-27 06:00:00	51.3888	30.0988	2500	0	0	1.01272e-09	0	0	0	0	0	0	0	0	0	1986-04-27 09:00:00	51.3888	30.0988	3000
1986-04-27 09:00:00	51.3888	30.0988	0	2.88611e-06	0.000339646	0.000453601	7.33217e-06	2.59478e-05	0.0078153	8.3128e-05	1.25856e-05	5.76971e-05	0.000665334	0.000147397	1.71116e-05	1986-04-27 12:00:00	51.3888	30.0988	500
1986-04-27 09:00:00	51.3888	30.0988	500	3.55669e-05	0.00166154	0.0022156	4.79614e-05	0.000112871	0.039656	0.000266288	0.000114278	0.000429928	0.000781299	0.000737166	0.000277123	1986-04-27 12:00:00	51.3888	30.0988	1000
1986-04-27 09:00:00	51.3888	30.0988	1000	2.85993e-05	0.00134532	0.00179362	2.32669e-06	0.00011151	0.031493	0.00016971	9.49715e-05	0.000363938	0.000527423	0.000589678	0.00020251	1986-04-27 12:00:00	51.3888	30.0988	1500
1986-04-27 09:00:00	51.3888	30.0988	1500	0	1.40496e-07	9.583e-10	0	0	0	0	0	0	0	0	0	1986-04-27 12:00:00	51.3888	30.0988	2000
1986-04-27 09:00:00	51.3888	30.0988	2000	0	0	9.42654e-10	0	0	0	0	0	0	0	0	0	1986-04-27 12:00:00	51.3888	30.0988	2500
1986-04-27 09:00:00	51.3888	30.0988	2500	0	0	9.26217e-10	0	0	0	0	0	0	0	0	0	1986-04-27 12:00:00	51.3888	30.0988	3000
1986-04-27 12:00:00	51.3888	30.0988	0	2.92025e-06	0.000339775	0.000453601	7.91128e-06	2.18338e-05	0.0078153	9.74302e-05	3.61122e-05	0.000126841	0.000291562	0.000147397	5.29447e-05	1986-04-27 15:00:00	51.3888	30.0988	500
1986-04-27 12:00:00	51.3888	30.0988	500	3.80257e-05	0.00166126	0.0022156	3.5626e-05	5.09222e-05	0.039656	0.000300545	2.59109e-05	0.000287138	0.000661951	0.000737166	0.000274629	1986-04-27 15:00:00	51.3888	30.0988	1000
1986-04-27 12:00:00	51.3888	30.0988	1000	3.40457e-05	0.00134484	0.00179362	5.58309e-06	5.60218e-05	0.031493	0.000161623	8.25605e-05	0.00012652	0.000220787	0.000589678	0.000219181	1986-04-27 15:00:00	51.3888	30.0988	1500
1986-04-27 12:00:00	51.3888	30.0988	1500	0	0	8.52843e-10	0.000219295	0	0	0	0	1.97728e-06	0	0	2.2161e-05	1986-04-27 15:00:00	51.3888	30.0988	2000
1986-04-27 12:00:00	51.3888	30.0988	2000	0	0	8.3267e-10	0	0	0	0	0	0	0	0	1.1022e-05	1986-04-27 15:00:00	51.3888	30.0988	2500
1986-04-27 12:00:00	51.3888	30.0988	2500	0	3.97525e-08	8.11798e-10	0	0	0	0	0	0	0	0	7.67089e-07	1986-04-27 15:00:00	51.3888	30.0988	3000
1986-04-27 15:00:00	51.3888	30.0988	0	1.15817e-06	0.000340411	0.000453601	4.17928e-08	0.0244295	0.0078153	0.0447616	2.97149e-05	5.5318e-05	0.000112121	0.000147397	5.5273e-05	1986-04-27 18:00:00	51.3888	30.0988	500
1986-04-27 15:00:00	51.3888	30.0988	500	0.00163105	0.00166208	0.0022156	0.0129216	9.64197e-06	0.039656	0.000313748	9.68325e-07	0.000275823	0.000550906	0.000737166	0.000276441	1986-04-27 18:00:00	51.3888	30.0988	1000
1986-04-27 15:00:00	51.3888	30.0988	1000	1.56334e-05	0.00134575	0.00179362	3.013e-05	9.68256e-05	0.031493	0.000179224	8.15371e-05	0.000218246	0.000437771	0.000589678	0.000220264	1986-04-27 18:00:00	51.3888	30.0988	1500
1986-04-27 15:00:00	51.3888	30.0988	1500	0	6.72969e-07	7.2166e-10	0.0121152	0	0	0	0	0	0	1.34285e-11	0	1986-04-27 18:00:00	51.3888	30.0988	2000
1986-04-27 15:00:00	51.3888	30.0988	2000	0	7.76431e-07	6.97554e-10	0	0.0140527	0	0.0413369	0	0	0	2.64295e-11	1.13303e-05	1986-04-27 18:00:00	51.3888	30.0988	2500
1986-04-27 15:00:00	51.3888	30.0988	2500	0	8.43647e-07	6.72856e-10	0	0	0	0	0	0	0.000181521	3.94988e-11	1.3464e-05	1986-04-27 18:00:00	51.3888	30.0988	3000
1986-04-27 18:00:00	51.3888	30.0988	0	1.10872e-05	0.000341075	0.000453601	6.03954e-06	0.0615933	0.0078153	0.200266	0.00500651	5.52591e-05	0.000110303	0.000147397	5.52738e-05	1986-04-27 21:00:00	51.3888	30.0988	500
1986-04-27 18:00:00	51.3888	30.0988	500	1.97422e-05	0.00166257	0.0022156	0.000319622	0.0109265	0.039656	0.0524729	0.000152467	0.000276578	0.000551697	0.000737166	0.000276437	1986-04-27 21:00:00	51.3888	30.0988	1000
1986-04-27 18:00:00	51.3888	30.0988	1000	7.52166e-06	0.00134606	0.00179362	4.68904e-05	0.000660728	0.031493	0.0042746	0.000138569	0.00022361	0.00044891	0.000589678	0.000221179	1986-04-27 21:00:00	51.3888	30.0988	1500
1986-04-27 18:00:00	51.3888	30.0988	1500	0	7.86617e-07	5.68539e-10	0	0	0	0	0	0	3.6476e-05	9.22538e-11	0	1986-04-27 21:00:00	51.3888	30.0988	2000
1986-04-27 18:00:00	51.3888	30.0988	2000	0	7.09324e-07	5.41177e-10	0	0.0462544	0	0.130386	0.126709	0	0.000342111	1.05511e-10	9.02773e-07	1986-04-27 21:00:00	51.3888	30.0988	2500
1986-04-27 18:00:00	51.3888	30.0988	2500	0	6.15205e-07	5.13343e-10	0	0.00145601	0	0.00327609	0.155517	8.39687e-06	0	1.18775e-10	0	1986-04-27 21:00:00	51.3888	30.0988	3000
1986-04-27 21:00:00	51.3888	30.0988	0	2.64908e-06	0.0021182	0.00282359	3.79163e-05	0.0275603	0.0477096	0.0618821	0.0128839	0.000339549	0.000679411	0.000905672	0.000339627	1986-04-28	51.3888	30.0988	500
1986-04-27 21:00:00	51.3888	30.0988	500	1.0881e-05	0.00055421	0.000738414	2.50473e-05	0.00109642	0.0132165	0.00498542	0.00249168	9.19094e-05	0.000183611	0.000245683	9.21308e-05	1986-04-28	51.3888	30.0988	1000
1986-04-27 21:00:00	51.3888	30.0988	1000	1.7599e-05	0.000448622	0.000597778	2.32182e-05	0.00155338	0.010496	0.00776424	4.03429e-05	7.32541e-05	0.000149277	0.000196528	7.3698e-05	1986-04-28	51.3888	30.0988	1500
1986-04-27 21:00:00	51.3888	30.0988	1500	0	1.85091e-07	3.9769e-10	0	0	0	0	0	1.25375e-07	0	1.71703e-10	0	1986-04-28	51.3888	30.0988	2000
1986-04-27 21:00:00	51.3888	30.0988	2000	0	9.29433e-08	3.67802e-10	0	0	0	0	0	0	0	1.84853e-10	0	1986-04-28	51.3888	30.0988	2500
1986-04-27 21:00:00	51.3888	30.0988	2500	0	1.85215e-08	3.37566e-10	0	0	0	0	0	0	1.50038e-20	1.9795e-10	0	1986-04-28	51.3888	30.0988	3000
1986-04-28	51.3888	30.0988	0	4.87929e-05	0.0030062	0.0040083	0.000106419	0.00016099	0.067652	0.00026657	6.79066e-05	0.000481766	0.000963517	0.00128472	0.000481765	1986-04-28 03:00:00	51.3888	30.0988	500
1986-04-28	51.3888	30.0988	500	0	0	2.76135e-10	0	0	0	0	0	0	0	2.23951e-10	0	1986-04-28 03:00:00	51.3888	30.0988	1000
1986-04-28	51.3888	30.0988	1000	0	0	2.44983e-10	0	0	0	0	0.0858707	0	0	2.36834e-10	0	1986-04-28 03:00:00	51.3888	30.0988	1500
1986-04-28	51.3888	30.0988	1500	0	3.50525e-09	2.1357e-10	0	0	0	0.000205007	0.000107768	0	0	2.49627e-10	0	1986-04-28 03:00:00	51.3888	30.0988	2000
1986-04-28	51.3888	30.0988	2000	0	3.97926e-08	1.81916e-10	0	0	0	0	0.0604833	0	6.00376e-21	2.6232e-10	1.21841e-33	1986-04-28 03:00:00	51.3888	30.0988	2500
1986-04-28	51.3888	30.0988	2500	0	4.19896e-08	1.50044e-10	0	0	0	0	0.0529823	0	3.91853e-21	2.74905e-10	0	1986-04-28 03:00:00	51.3888	30.0988	3000
1986-04-28 03:00:00	51.3888	30.0988	0	0.000126049	0.00300625	0.0040083	0.000116817	0.000179506	0.067652	9.58831e-05	0.000151344	0.000481349	0.000963516	0.00128472	0.000481768	1986-04-28 06:00:00	51.3888	30.0988	500
1986-04-28 03:00:00	51.3888	30.0988	500	0	0	8.57343e-11	0	0	0	0	0	0	0	2.99711e-10	0	1986-04-28 06:00:00	51.3888	30.0988	1000
1986-04-28 03:00:00	51.3888	30.0988	1000	0	0	5.33402e-11	0	0	0	0	0	0	3.6419e-08	3.11916e-10	5.93759e-34	1986-04-28 06:00:00	51.3888	30.0988	1500
1986-04-28 03:00:00	51.3888	30.0988	1500	0	0	2.08162e-11	0	0	0	0	0	0	0	3.23977e-10	0	1986-04-28 06:00:00	51.3888	30.0988	2000
1986-04-28 03:00:00	51.3888	30.0988	2000	0	0	0	0	0	0	0	0	0	0	3.35885e-10	0	1986-04-28 06:00:00	51.3888	30.0988	2500
1986-04-28 03:00:00	51.3888	30.0988	2500	0	0	0	0.000922259	0	0	0	0	0	0	3.47633e-10	0	1986-04-28 06:00:00	51.3888	30.0988	3000
1986-04-28 06:00:00	51.3888	30.0988	0	3.62913e-05	0.00300619	0.0040083	9.11823e-05	1.00788e-06	0.067652	1.14961e-05	0.00137817	0.000481656	0.000963536	0.00128472	0.000481769	1986-04-28 09:00:00	51.3888	30.0988	500
1986-04-28 06:00:00	51.3888	30.0988	500	0	0	0	0	0	0	0	0	0	0	3.70611e-10	1.63746e-09	1986-04-28 09:00:00	51.3888	30.0988	1000
1986-04-28 06:00:00	51.3888	30.0988	1000	0	4.80113e-09	0	0	0	0	0	0	0	0	3.81824e-10	0	1986-04-28 09:00:00	51.3888	30.0988	1500
1986-04-28 06:00:00	51.3888	30.0988	1500	0	2.07045e-08	0	0	0	0	0	0	0	0	3.92843e-10	0	1986-04-28 09:00:00	51.3888	30.0988	2000
1986-04-28 06:00:00	51.3888	30.0988	2000	0	2.21181e-08	0	0	0	0	0	0	2.42468e-10	8.44421e-08	4.03658e-10	0	1986-04-28 09:00:00	51.3888	30.0988	2500
1986-04-28 06:00:00	51.3888	30.0988	2500	0.00135849	1.24964e-08	0	0	0	0	0	0	0	0	4.14262e-10	0	1986-04-28 09:00:00	51.3888	30.0988	3000
1986-04-28 09:00:00	51.3888	30.0988	0	0.000102649	0.00300622	0.0040083	3.44025e-06	0.000176517	0.067652	0.00067555	0.0652727	0.000481673	0.000963504	0.00128472	0.000481769	1986-04-28 12:00:00	51.3888	30.0988	500
1986-04-28 09:00:00	51.3888	30.0988	500	0	0	0	0	0	0	0	0.00180499	0	0	4.34804e-10	0	1986-04-28 12:00:00	51.3888	30.0988	1000
1986-04-28 09:00:00	51.3888	30.0988	1000	0	0	0	0	0	0	0	0	0	0	4.44726e-10	3.28977e-34	1986-04-28 12:00:00	51.3888	30.0988	1500
1986-04-28 09:00:00	51.3888	30.0988	1500	0	0	0	0	0	0	0	0	0	0	4.54405e-10	1.15386e-57	1986-04-28 12:00:00	51.3888	30.0988	2000
1986-04-28 09:00:00	51.3888	30.0988	2000	0.0177321	0	0	0	0	0	0	0	0	0	4.63835e-10	0	1986-04-28 12:00:00	51.3888	30.0988	2500
1986-04-28 09:00:00	51.3888	30.0988	2500	0	0	0	0	0	0	0	0	0	1.49345e-20	4.73007e-10	6.36853e-57	1986-04-28 12:00:00	51.3888	30.0988	3000
1986-04-28 12:00:00	51.3888	30.0988	0	0.00010643	0.00300622	0.0040083	8.89359e-05	0.000157729	0.067652	0.00053272	0.000151351	0.000481736	0.000963523	0.00128472	0.000481769	1986-04-28 15:00:00	51.3888	30.0988	500
1986-04-28 12:00:00	51.3888	30.0988	500	0	1.18003e-08	0	0	0	0	0	0	0	0	4.90551e-10	0	1986-04-28 15:00:00	51.3888	30.0988	1000
1986-04-28 12:00:00	51.3888	30.0988	1000	0	2.42755e-08	0	0	0	0	0	0	0	0	4.98909e-10	0	1986-04-28 15:00:00	51.3888	30.0988	1500
1986-04-28 12:00:00	51.3888	30.0988	1500	0	3.18925e-08	0	0	0	0	0	0	0	0	5.06984e-10	0	1986-04-28 15:00:00	51.3888	30.0988	2000
1986-04-28 12:00:00	51.3888	30.0988	2000	0.136064	3.23406e-08	0	0	0	0	0	0	0	0	5.14767e-10	4.0746e-33	1986-04-28 15:00:00	51.3888	30.0988	2500
1986-04-28 12:00:00	51.3888	30.0988	2500	0	2.39276e-08	0	0	0	0	0	0	0	3.08076e-18	5.22255e-10	0	1986-04-28 15:00:00	51.3888	30.0988	3000
1986-04-28 15:00:00	51.3888	30.0988	0	8.41763e-05	0.00300623	0.0040083	0.000111246	0.00771187	0.067652	0.0117211	0.0278384	0.000481672	0.000956458	0.00128472	0.000481767	1986-04-28 18:00:00	51.3888	30.0988	500
1986-04-28 15:00:00	51.3888	30.0988	500	0	0	0	0	0	0	0	0	0	0	5.36319e-10	0	1986-04-28 18:00:00	51.3888	30.0988	1000
1986-04-28 15:00:00	51.3888	30.0988	1000	0.0132213	0	0	0	0	0	0	0	0	0	5.42886e-10	2.25816e-33	1986-04-28 18:00:00	51.3888	30.0988	1500
1986-04-28 15:00:00	51.3888	30.0988	1500	0.0404652	0	0	0	0	0	0	0	0	0	5.49134e-10	7.61801e-57	1986-04-28 18:00:00	51.3888	30.0988	2000
1986-04-28 15:00:00	51.3888	30.0988	2000	0.0645641	0	0	0	0	0	0	0	0	0	5.55061e-10	0	1986-04-28 18:00:00	51.3888	30.0988	2500
1986-04-28 15:00:00	51.3888	30.0988	2500	0.00779774	0	0	0	0	0	0	0	0	8.24973e-19	5.6066e-10	1.69781e-34	1986-04-28 18:00:00	51.3888	30.0988	3000
1986-04-28 18:00:00	51.3888	30.0988	0	5.67062e-05	0.00300608	0.0040083	0.000104146	0.00163129	0.067652	0.00747722	6.49414e-05	0.000494607	0.000961634	0.00128472	0.000481769	1986-04-28 21:00:00	51.3888	30.0988	500
1986-04-28 18:00:00	51.3888	30.0988	500	0	0	0	0	0	0	0	0	0	0	5.7086e-10	1.69781e-34	1986-04-28 21:00:00	51.3888	30.0988	1000
1986-04-28 18:00:00	51.3888	30.0988	1000	0	0	0	0	0.00227163	0	0.00148488	0	0	0	5.75452e-10	0	1986-04-28 21:00:00	51.3888	30.0988	1500
1986-04-28 18:00:00	51.3888	30.0988	1500	0	0	0	0	7.18316e-06	0	0.000149544	0	0	0	5.79701e-10	0	1986-04-28 21:00:00	51.3888	30.0988	2000
1986-04-28 18:00:00	51.3888	30.0988	2000	0.00404533	0	0	0	2.45729e-06	0	3.90417e-05	0	0	0	5.83601e-10	0	1986-04-28 21:00:00	51.3888	30.0988	2500
1986-04-28 18:00:00	51.3888	30.0988	2500	0.000967954	0	0	0	0	0	0	0	0	2.45519e-18	5.87151e-10	4.25078e-32	1986-04-28 21:00:00	51.3888	30.0988	3000
1986-04-28 21:00:00	51.3888	30.0988	0	5.55626e-05	0.00237321	0.00316429	0.000189382	0.000589485	0.0536562	0.00192923	0.000142708	0.000398798	0.000757802	0.00101793	0.000381748	1986-04-29	51.3888	30.0988	500
1986-04-28 21:00:00	51.3888	30.0988	500	0	4.52694e-08	0	0	0	0	0	0	2.41719e-06	0	5.93185e-10	2.24744e-09	1986-04-29	51.3888	30.0988	1000
1986-04-28 21:00:00	51.3888	30.0988	1000	0	9.44455e-08	0	0	0.00280588	0	0.00620457	0	3.60265e-07	0	5.95664e-10	3.08079e-09	1986-04-29	51.3888	30.0988	1500
1986-04-28 21:00:00	51.3888	30.0988	1500	0	1.37952e-07	0	0	0	0	0	0	0	2.08326e-05	5.97783e-10	0	1986-04-29	51.3888	30.0988	2000
1986-04-28 21:00:00	51.3888	30.0988	2000	0	1.72275e-07	0	0	0	0	0	0	0	0	5.99538e-10	6.07222e-31	1986-04-29	51.3888	30.0988	2500
1986-04-28 21:00:00	51.3888	30.0988	2500	0	1.94943e-07	0	0	0	0	0	0	0	0	6.00928e-10	0	1986-04-29	51.3888	30.0988	3000
1986-04-29	51.3888	30.0988	0	2.89654e-05	0.00205699	0.00274238	0.000158733	1.71994e-07	0.04666	0.000486508	5.06023e-05	0.000331823	0.000630898	0.000884563	0.000331015	1986-04-29 03:00:00	51.3888	30.0988	500
1986-04-29	51.3888	30.0988	500	0	2.03796e-07	0	0	0	0	0	0	2.17106e-05	3.31104e-05	6.02612e-10	2.09852e-06	1986-04-29 03:00:00	51.3888	30.0988	1000
1986-04-29	51.3888	30.0988	1000	0	1.9173e-07	0	0	0	0	0	0	2.96506e-05	0.000179391	6.02904e-10	5.02195e-07	1986-04-29 03:00:00	51.3888	30.0988	1500
1986-04-29	51.3888	30.0988	1500	0	1.70268e-07	0	0	0	0	0	0	1.41996e-05	0.000225951	6.02828e-10	1.05105e-07	1986-04-29 03:00:00	51.3888	30.0988	2000
1986-04-29	51.3888	30.0988	2000	0.00842548	1.41214e-07	0	0.00021884	0	0	0	0	8.55702e-06	6.50559e-05	6.02385e-10	5.05782e-07	1986-04-29 03:00:00	51.3888	30.0988	2500
1986-04-29	51.3888	30.0988	2500	0	1.06651e-07	0	0	0	0	0	0	1.19791e-06	4.99601e-05	6.01576e-10	2.03718e-07	1986-04-29 03:00:00	51.3888	30.0988	3000
1986-04-29 03:00:00	51.3888	30.0988	0	3.2712e-05	0.00205685	0.00274238	6.09885e-05	0.00515539	0.04666	0.013935	9.64128e-05	0.000231246	0.000389097	0.000884563	0.000321447	1986-04-29 06:00:00	51.3888	30.0988	500
1986-04-29 03:00:00	51.3888	30.0988	500	0	3.30444e-08	0	0	0	0	0	0	0	0	5.98859e-10	0	1986-04-29 06:00:00	51.3888	30.0988	1000
1986-04-29 03:00:00	51.3888	30.0988	1000	0	6.45832e-10	0	0	0	0	0	0	0	7.6565e-05	5.96952e-10	0	1986-04-29 06:00:00	51.3888	30.0988	1500
1986-04-29 03:00:00	51.3888	30.0988	1500	0.00871314	0	0	0.0255374	0	0	0	0	0	3.52194e-05	5.94682e-10	0	1986-04-29 06:00:00	51.3888	30.0988	2000
1986-04-29 03:00:00	51.3888	30.0988	2000	0	0	0	0	0	0	0	0	8.14233e-06	5.94808e-05	5.92048e-10	5.13783e-07	1986-04-29 06:00:00	51.3888	30.0988	2500
1986-04-29 03:00:00	51.3888	30.0988	2500	2.40909e-05	0	0	0.0049185	0	0	0	0	4.99534e-05	0.00032068	5.89054e-10	6.91915e-06	1986-04-29 06:00:00	51.3888	30.0988	3000
1986-04-29 06:00:00	51.3888	30.0988	0	4.16119e-05	0.00205674	0.00274238	3.77608e-05	3.39327e-05	0.04666	8.44833e-06	5.18114e-05	0.000207844	0.000216158	0.000884563	0.000321982	1986-04-29 09:00:00	51.3888	30.0988	500
1986-04-29 06:00:00	51.3888	30.0988	500	0	0	0	0	0	0	0	0	0	0	5.81991e-10	0	1986-04-29 09:00:00	51.3888	30.0988	1000
1986-04-29 06:00:00	51.3888	30.0988	1000	0	0	0	0	0.000351814	0	0	0	0	0	5.77926e-10	0	1986-04-29 09:00:00	51.3888	30.0988	1500
1986-04-29 06:00:00	51.3888	30.0988	1500	0	0	0	0	0	0	0	0	0	0	5.7351e-10	0	1986-04-29 09:00:00	51.3888	30.0988	2000
1986-04-29 06:00:00	51.3888	30.0988	2000	0	0	0	0	0	0	0	0	1.01458e-05	5.07088e-05	5.68746e-10	1.8379e-07	1986-04-29 09:00:00	51.3888	30.0988	2500
1986-04-29 06:00:00	51.3888	30.0988	2500	0	0	0	0	0	0	0	0	3.84308e-05	0.000149475	5.63638e-10	4.71517e-07	1986-04-29 09:00:00	51.3888	30.0988	3000
1986-04-29 09:00:00	51.3888	30.0988	0	1.25789e-05	0.00205671	0.00274238	8.17121e-05	6.635e-05	0.04666	0.000155221	0.000160775	0.000164946	0.000356792	0.000884563	0.000316101	1986-04-29 12:00:00	51.3888	30.0988	500
1986-04-29 09:00:00	51.3888	30.0988	500	0	2.63585e-09	0	0	0	0	0	0	0	0	5.52405e-10	0	1986-04-29 12:00:00	51.3888	30.0988	1000
1986-04-29 09:00:00	51.3888	30.0988	1000	0	6.44574e-08	0	0	0	0	0	0	0	0	5.46288e-10	0	1986-04-29 12:00:00	51.3888	30.0988	1500
1986-04-29 09:00:00	51.3888	30.0988	1500	0	9.69961e-08	0	0	0	0	0	0	0	0	5.39846e-10	0	1986-04-29 12:00:00	51.3888	30.0988	2000
1986-04-29 09:00:00	51.3888	30.0988	2000	0	8.93873e-08	0	0	0	0	0	0	4.09992e-05	0.000211407	5.33082e-10	0	1986-04-29 12:00:00	51.3888	30.0988	2500
1986-04-29 09:00:00	51.3888	30.0988	2500	0	3.96907e-08	0	0	0	0	0	0	3.19363e-05	0.000199861	5.26001e-10	4.0591e-07	1986-04-29 12:00:00	51.3888	30.0988	3000
1986-04-29 12:00:00	51.3888	30.0988	0	0.00964862	0.00205675	0.00274238	7.05122e-05	3.83512e-05	0.04666	0.000210507	6.50652e-05	0.000255334	0.000514384	0.000884563	0.000322071	1986-04-29 15:00:00	51.3888	30.0988	500
1986-04-29 12:00:00	51.3888	30.0988	500	0	0	0	0.00764819	0	0	0	0	0	0	5.1091e-10	0	1986-04-29 15:00:00	51.3888	30.0988	1000
1986-04-29 12:00:00	51.3888	30.0988	1000	0	0	0	0	0	0	0	0	0	0	5.02911e-10	0	1986-04-29 15:00:00	51.3888	30.0988	1500
1986-04-29 12:00:00	51.3888	30.0988	1500	0	0	0	0	0	0	0	0	0	0.000119803	4.94617e-10	0	1986-04-29 15:00:00	51.3888	30.0988	2000
1986-04-29 12:00:00	51.3888	30.0988	2000	0	0	0	0	0	0	0	0	2.95572e-06	1.52813e-05	4.86032e-10	3.74841e-06	1986-04-29 15:00:00	51.3888	30.0988	2500
1986-04-29 12:00:00	51.3888	30.0988	2500	0.00846618	0	0	0.00207845	0.00179373	0	0.00539075	0	6.93083e-05	0.000106301	4.77163e-10	0	1986-04-29 15:00:00	51.3888	30.0988	3000
1986-04-29 15:00:00	51.3888	30.0988	0	9.12291e-06	0.00205685	0.00274238	3.95561e-05	0.000137475	0.04666	0.000634698	7.80164e-05	0.000228617	0.00042888	0.000884563	0.000331246	1986-04-29 18:00:00	51.3888	30.0988	500
1986-04-29 15:00:00	51.3888	30.0988	500	0	1.5183e-07	0	0	0	0	0	0	0	0	4.58593e-10	0	1986-04-29 18:00:00	51.3888	30.0988	1000
1986-04-29 15:00:00	51.3888	30.0988	1000	0	2.08374e-07	0	0	0	0	0	0	0	0	4.48904e-10	0	1986-04-29 18:00:00	51.3888	30.0988	1500
1986-04-29 15:00:00	51.3888	30.0988	1500	0	2.20828e-07	0	0.000131145	0	0	0	0	0	0	4.38955e-10	0	1986-04-29 18:00:00	51.3888	30.0988	2000
1986-04-29 15:00:00	51.3888	30.0988	2000	0	1.96567e-07	0	0	0	0	0	0	0	0	4.2875e-10	0	1986-04-29 18:00:00	51.3888	30.0988	2500
1986-04-29 15:00:00	51.3888	30.0988	2500	0	1.45659e-07	0	0	0	0	0	0	0	0.000417656	4.18297e-10	0	1986-04-29 18:00:00	51.3888	30.0988	3000
1986-04-29 18:00:00	51.3888	30.0988	0	1.89193e-05	0.00205686	0.00274238	2.14967e-05	6.48434e-05	0.04666	0.000364283	0.000183397	0.000218832	0.000471751	0.000884563	0.000325115	1986-04-29 21:00:00	51.3888	30.0988	500
1986-04-29 18:00:00	51.3888	30.0988	500	0	1.08572e-08	0	0	0	0	0	0	0	0	3.96673e-10	0	1986-04-29 21:00:00	51.3888	30.0988	1000
1986-04-29 18:00:00	51.3888	30.0988	1000	0	0	0	0	0	0	0	0	0	0	3.85516e-10	0	1986-04-29 21:00:00	51.3888	30.0988	1500
1986-04-29 18:00:00	51.3888	30.0988	1500	0	0	0	0	0	0	0	0	0	0	3.74138e-10	0	1986-04-29 21:00:00	51.3888	30.0988	2000
1986-04-29 18:00:00	51.3888	30.0988	2000	0	0	0	0	0	0	0	0	0	0	3.62547e-10	0	1986-04-29 21:00:00	51.3888	30.0988	2500
1986-04-29 18:00:00	51.3888	30.0988	2500	0	0	0	0	0	0	0	0	0	0	3.50749e-10	0	1986-04-29 21:00:00	51.3888	30.0988	3000
1986-04-29 21:00:00	51.3888	30.0988	0	3.7679e-05	0.00184573	0.00246104	6.29189e-05	0.0069601	0.0419903	0.0184413	4.0938e-05	0.000118298	0.000211811	0.000786291	0.000292084	1986-04-30	51.3888	30.0988	500
1986-04-29 21:00:00	51.3888	30.0988	500	0	1.36902e-08	0	0	0	0	0	0.0348166	0	0	3.26565e-10	0	1986-04-30	51.3888	30.0988	1000
1986-04-29 21:00:00	51.3888	30.0988	1000	0	5.68142e-08	0	0	0	0	0	0	0	4.71217e-05	3.14192e-10	0	1986-04-30	51.3888	30.0988	1500
1986-04-29 21:00:00	51.3888	30.0988	1500	0	5.18295e-08	0	0	0.000433052	0	0.00118847	0.0071374	0	0	3.01641e-10	0	1986-04-30	51.3888	30.0988	2000
1986-04-29 21:00:00	51.3888	30.0988	2000	0	1.28123e-08	0	0	0.0240686	0	0.0627592	0.0544828	0	0	2.88921e-10	0	1986-04-30	51.3888	30.0988	2500
1986-04-29 21:00:00	51.3888	30.0988	2500	0	0	0	0	0	0	0	0	0	0	2.76038e-10	0	1986-04-30	51.3888	30.0988	3000
1986-04-30	51.3888	30.0988	0	5.93365e-05	0.0017402	0.0023204	7.06371e-06	4.06009e-05	0.039656	0.00103143	0.00237571	0.000104822	0.000276315	0.000737166	0.000276913	1986-04-30 03:00:00	51.3888	30.0988	500
1986-04-30	51.3888	30.0988	500	0	0	0	0	0	0	0	0	0	0	2.49816e-10	0	1986-04-30 03:00:00	51.3888	30.0988	1000
1986-04-30	51.3888	30.0988	1000	0	0	0	0	0	0	0	0	0	0	2.36492e-10	1.68912e-06	1986-04-30 03:00:00	51.3888	30.0988	1500
1986-04-30	51.3888	30.0988	1500	0	0	0	0	0	0	0	0	0	0	2.23036e-10	0	1986-04-30 03:00:00	51.3888	30.0988	2000
1986-04-30	51.3888	30.0988	2000	0	0	0	0	0	0	0	0	0	0	2.09458e-10	0	1986-04-30 03:00:00	51.3888	30.0988	2500
1986-04-30	51.3888	30.0988	2500	0	1.89024e-08	0	0	0.00300838	0	0.00856358	0	0	0	1.95764e-10	0	1986-04-30 03:00:00	51.3888	30.0988	3000
1986-04-30 03:00:00	51.3888	30.0988	0	4.42218e-05	0.00174047	0.0023204	5.82547e-05	3.27476e-06	0.039656	0.000131933	0.000160081	8.54207e-05	4.3891e-05	0.000737166	0.000273901	1986-04-30 06:00:00	51.3888	30.0988	500
1986-04-30 03:00:00	51.3888	30.0988	500	0	3.6772e-07	0	0	0	0	0	0	0	0	1.68065e-10	3.39401e-06	1986-04-30 06:00:00	51.3888	30.0988	1000
1986-04-30 03:00:00	51.3888	30.0988	1000	0	6.07764e-07	0	0	0	0	0	0	0	0	1.54076e-10	3.81667e-06	1986-04-30 06:00:00	51.3888	30.0988	1500
1986-04-30 03:00:00	51.3888	30.0988	1500	0	8.90657e-07	0	0	0	0	0	0	0	0	1.40006e-10	1.24758e-06	1986-04-30 06:00:00	51.3888	30.0988	2000
1986-04-30 03:00:00	51.3888	30.0988	2000	0	1.21395e-06	0	0	0	0	0	0	0	0.000214677	1.25864e-10	0	1986-04-30 06:00:00	51.3888	30.0988	2500
1986-04-30 03:00:00	51.3888	30.0988	2500	0	1.57301e-06	0	0	0	0	0	0	0	0	1.11657e-10	0	1986-04-30 06:00:00	51.3888	30.0988	3000
1986-04-30 06:00:00	51.3888	30.0988	0	1.8712e-07	0.00174227	0.0023204	1.49128e-05	4.54752e-06	0.039656	0.000140718	0.000147574	0.000198029	0.000271364	0.000737166	0.000278433	1986-04-30 09:00:00	51.3888	30.0988	500
1986-04-30 06:00:00	51.3888	30.0988	500	0	2.37179e-06	0	0	0	0	0	0	0	0	8.30878e-11	1.45412e-06	1986-04-30 09:00:00	51.3888	30.0988	1000
1986-04-30 06:00:00	51.3888	30.0988	1000	0	2.79466e-06	0	0	0	0	0	0	0	0	6.87423e-11	1.80618e-06	1986-04-30 09:00:00	51.3888	30.0988	1500
1986-04-30 06:00:00	51.3888	30.0988	1500	0	3.21851e-06	0	0	0	0	0	0	0	0	5.43681e-11	4.09034e-06	1986-04-30 09:00:00	51.3888	30.0988	2000
1986-04-30 06:00:00	51.3888	30.0988	2000	0	3.62969e-06	0	0	0	0	0	0	0	0.000142778	3.99738e-11	0	1986-04-30 09:00:00	51.3888	30.0988	2500
1986-04-30 06:00:00	51.3888	30.0988	2500	0	4.0125e-06	0	0	0	0	0	0	0	0.000537444	2.55684e-11	2.74863e-06	1986-04-30 09:00:00	51.3888	30.0988	3000
1986-04-30 09:00:00	51.3888	30.0988	0	1.11978e-05	0.00174465	0.0023204	5.15529e-05	7.36133e-07	0.039656	0.000127416	3.52226e-05	0.000162399	0.00025561	0.000737166	0.000279385	1986-04-30 12:00:00	51.3888	30.0988	500
1986-04-30 09:00:00	51.3888	30.0988	500	0	4.62175e-06	0	0	0	0	0	0	0	0	0	0	1986-04-30 12:00:00	51.3888	30.0988	1000
1986-04-30 09:00:00	51.3888	30.0988	1000	0	4.80991e-06	0	0	0	0	0	0	0	0	0	0	1986-04-30 12:00:00	51.3888	30.0988	1500
1986-04-30 09:00:00	51.3888	30.0988	1500	0	4.90182e-06	0	0	0	0	0	0	0	0	0	0	1986-04-30 12:00:00	51.3888	30.0988	2000
1986-04-30 09:00:00	51.3888	30.0988	2000	0	4.89056e-06	0	0	0	0	0	0	0	0	0	0	1986-04-30 12:00:00	51.3888	30.0988	2500
1986-04-30 09:00:00	51.3888	30.0988	2500	0.00491824	4.77657e-06	0	0	0	0	0	0	0	0.00021906	0	1.2298e-06	1986-04-30 12:00:00	51.3888	30.0988	3000
1986-04-30 12:00:00	51.3888	30.0988	0	4.92899e-05	0.00174488	0.0023204	1.78286e-05	4.02431e-05	0.039656	1.17953e-05	0.000137239	0.000108289	0.000273962	0.000737166	0.000239339	1986-04-30 15:00:00	51.3888	30.0988	500
1986-04-30 12:00:00	51.3888	30.0988	500	0	4.28948e-06	0	0	0	0	0	0	0	4.7796e-05	0	0	1986-04-30 15:00:00	51.3888	30.0988	1000
1986-04-30 12:00:00	51.3888	30.0988	1000	0	3.94339e-06	0	0	0	0	0	0	0	0	0	0	1986-04-30 15:00:00	51.3888	30.0988	1500
1986-04-30 12:00:00	51.3888	30.0988	1500	0	3.54783e-06	0	0	0	0	0	0	0	0	0	0	1986-04-30 15:00:00	51.3888	30.0988	2000
1986-04-30 12:00:00	51.3888	30.0988	2000	0	3.11697e-06	0	0	0	0	0	0	0	0	0	0	1986-04-30 15:00:00	51.3888	30.0988	2500
1986-04-30 12:00:00	51.3888	30.0988	2500	0.00123941	2.66413e-06	0	0	0	0	0	0	0	0	0	4.32568e-06	1986-04-30 15:00:00	51.3888	30.0988	3000
1986-04-30 15:00:00	51.3888	30.0988	0	2.03701e-05	0.0017425	0.0023204	3.09763e-05	9.63217e-05	0.039656	0.000358425	0.000190695	0.000140086	0.000159506	0.000737166	0.000188266	1986-04-30 18:00:00	51.3888	30.0988	500
1986-04-30 15:00:00	51.3888	30.0988	500	0	1.73737e-06	0	0.000138498	0	0	0	0	0	0	0	0	1986-04-30 18:00:00	51.3888	30.0988	1000
1986-04-30 15:00:00	51.3888	30.0988	1000	0	1.28331e-06	0	7.94287e-05	0	0	0	0	0	0	0	0	1986-04-30 18:00:00	51.3888	30.0988	1500
1986-04-30 15:00:00	51.3888	30.0988	1500	0	8.4875e-07	0	0	0.00528152	0	0.0067479	0	0	0	0	0	1986-04-30 18:00:00	51.3888	30.0988	2000
1986-04-30 15:00:00	51.3888	30.0988	2000	0	4.43512e-07	0	0	0.00660184	0	0.0265222	0	0	0	0	0	1986-04-30 18:00:00	51.3888	30.0988	2500
1986-04-30 15:00:00	51.3888	30.0988	2500	0	7.72355e-08	0	0	0	0	0	0	0	0.000108915	0	4.73322e-07	1986-04-30 18:00:00	51.3888	30.0988	3000
1986-04-30 18:00:00	51.3888	30.0988	0	7.66032e-05	0.00174006	0.0023204	5.13488e-05	0.000160283	0.039656	0.000345167	1.27843e-05	0.000147701	0.000417954	0.000737166	0.000218482	1986-04-30 21:00:00	51.3888	30.0988	500
1986-04-30 18:00:00	51.3888	30.0988	500	0	0	0	0	0.224115	0	0.562458	0.142256	0	0	0	0	1986-04-30 21:00:00	51.3888	30.0988	1000
1986-04-30 18:00:00	51.3888	30.0988	1000	0	0	0	0	0.000247957	0	0	0.347295	0	0	0	0	1986-04-30 21:00:00	51.3888	30.0988	1500
1986-04-30 18:00:00	51.3888	30.0988	1500	0	0	0	0	0	0	0	0	0	0	0	0	1986-04-30 21:00:00	51.3888	30.0988	2000
1986-04-30 18:00:00	51.3888	30.0988	2000	0	0	0	0.000183587	0	0	0	0	0	0	0	0	1986-04-30 21:00:00	51.3888	30.0988	2500
1986-04-30 18:00:00	51.3888	30.0988	2500	0	0	0	0	0	0	0	0	0	0	0	0	1986-04-30 21:00:00	51.3888	30.0988	3000
1986-04-30 21:00:00	51.3888	30.0988	0	7.34791e-05	0.00173955	0.0023204	6.28944e-05	1.66421e-05	0.039656	0.000503161	0.000143997	0.000130791	0.000244616	0.000737166	0.000234063	1986-05-01	51.3888	30.0988	500
1986-04-30 21:00:00	51.3888	30.0988	500	0	0	2.98934e-11	0	1.38327e-05	0	0.01678	0	0	0	0	0	1986-05-01	51.3888	30.0988	1000
1986-04-30 21:00:00	51.3888	30.0988	1000	0	0	6.59574e-11	0	0	0	0	0	0	0	0	0	1986-05-01	51.3888	30.0988	1500
1986-04-30 21:00:00	51.3888	30.0988	1500	0	0	1.01987e-10	0	0.00074725	0	0.0013205	0.0138232	0	0	0	0	1986-05-01	51.3888	30.0988	2000
1986-04-30 21:00:00	51.3888	30.0988	2000	0	1.56846e-07	1.3796e-10	0	0.00106776	0	0.00351126	0.00290845	0	0	0	0	1986-05-01	51.3888	30.0988	2500
1986-04-30 21:00:00	51.3888	30.0988	2500	0	4.24724e-07	1.73853e-10	0	0.000255038	0	0.000327449	0	0	0	0	0	1986-05-01	51.3888	30.0988	3000
1986-05-01	51.3888	30.0988	0	9.9184e-06	0.00174096	0.00232041	2.3209e-05	0.00111934	0.039656	0.00761565	0.000122998	0.000216333	0.000417687	0.000737166	0.000248837	1986-05-01 03:00:00	51.3888	30.0988	500
1986-05-01	51.3888	30.0988	500	0	8.43195e-07	2.45307e-10	0	0	0	0	0	0	0	0	0	1986-05-01 03:00:00	51.3888	30.0988	1000
1986-05-01	51.3888	30.0988	1000	0	9.53831e-07	2.80822e-10	0	0	0	0	0	4.62161e-12	0	0	2.41574e-29	1986-05-01 03:00:00	51.3888	30.0988	1500
1986-05-01	51.3888	30.0988	1500	0	9.81551e-07	3.16166e-10	0	0	0	0	0	1.11315e-09	0	0	1.97155e-32	1986-05-01 03:00:00	51.3888	30.0988	2000
1986-05-01	51.3888	30.0988	2000	0	9.23725e-07	3.51316e-10	0	0	0	0	0	0	8.04254e-12	0	1.7193e-31	1986-05-01 03:00:00	51.3888	30.0988	2500
1986-05-01	51.3888	30.0988	2500	0	7.8588e-07	3.8625e-10	0	0.000172153	0	0	0	1.77053e-13	0	0	0	1986-05-01 03:00:00	51.3888	30.0988	3000
1986-05-01 03:00:00	51.3888	30.0988	0	7.7883e-05	0.00174089	0.00232041	6.74936e-05	7.35617e-06	0.039656	0.000612174	9.02881e-05	0.00027257	0.00054919	0.000737166	0.000276241	1986-05-01 06:00:00	51.3888	30.0988	500
1986-05-01 03:00:00	51.3888	30.0988	500	0	3.46591e-07	4.55382e-10	3.253e-05	0.00852596	0	0.0226142	0	1.69618e-10	2.79451e-11	0	0	1986-05-01 06:00:00	51.3888	30.0988	1000
1986-05-01 03:00:00	51.3888	30.0988	1000	0	9.78678e-08	4.89535e-10	0	0	0	0	0	0	0	0	1.7193e-31	1986-05-01 06:00:00	51.3888	30.0988	1500
1986-05-01 03:00:00	51.3888	30.0988	1500	0	0	5.23384e-10	0	0	0	0	0	7.54648e-11	3.04346e-24	0	6.02913e-55	1986-05-01 06:00:00	51.3888	30.0988	2000
1986-05-01 03:00:00	51.3888	30.0988	2000	0	0	5.56907e-10	0	0	0	0	0	0	0	0	0	1986-05-01 06:00:00	51.3888	30.0988	2500
1986-05-01 03:00:00	51.3888	30.0988	2500	0	0	5.90083e-10	0	0	0	0	0	0	5.63699e-26	0	0	1986-05-01 06:00:00	51.3888	30.0988	3000
1986-05-01 06:00:00	51.3888	30.0988	0	5.95427e-05	0.00173977	0.00232041	2.55317e-05	8.11191e-05	0.039656	0.000143866	0.00202993	0.000276437	0.000552874	0.000737165	0.000276437	1986-05-01 09:00:00	51.3888	30.0988	500
1986-05-01 06:00:00	51.3888	30.0988	500	0	0	6.55307e-10	0	0	0	0	0.00756824	0	5.1759e-13	0	0	1986-05-01 09:00:00	51.3888	30.0988	1000
1986-05-01 06:00:00	51.3888	30.0988	1000	0	0	6.87314e-10	0	0	0	0	0.0175483	0	0	0	0	1986-05-01 09:00:00	51.3888	30.0988	1500
1986-05-01 06:00:00	51.3888	30.0988	1500	0	0	7.18889e-10	0	0	0	0	0	3.45376e-11	5.63699e-26	0	0	1986-05-01 09:00:00	51.3888	30.0988	2000
1986-05-01 06:00:00	51.3888	30.0988	2000	0	0	7.50014e-10	0	0	0	0	0	0	0	0	0	1986-05-01 09:00:00	51.3888	30.0988	2500
1986-05-01 06:00:00	51.3888	30.0988	2500	0	0	7.80668e-10	0	0	0	0	0	0	2.73674e-26	0	0	1986-05-01 09:00:00	51.3888	30.0988	3000
1986-05-01 09:00:00	51.3888	30.0988	0	7.08395e-05	0.00174046	0.00232041	3.30014e-05	5.66943e-05	0.039656	0.000373773	9.93281e-05	0.000276437	0.000552874	0.000737165	0.000276437	1986-05-01 12:00:00	51.3888	30.0988	500
1986-05-01 09:00:00	51.3888	30.0988	500	0	3.88693e-07	8.40483e-10	0	0	0	0	0	0	2.51289e-13	0	0	1986-05-01 12:00:00	51.3888	30.0988	1000
1986-05-01 09:00:00	51.3888	30.0988	1000	0	5.95352e-07	8.69606e-10	0	0	0	0	0	0	0	0	0	1986-05-01 12:00:00	51.3888	30.0988	1500
1986-05-01 09:00:00	51.3888	30.0988	1500	0	7.67027e-07	8.9818e-10	0	0	0	0	0	0	2.73674e-26	0	0	1986-05-01 12:00:00	51.3888	30.0988	2000
1986-05-01 09:00:00	51.3888	30.0988	2000	0	8.96921e-07	9.26186e-10	0	0	0	0	0	7.49914e-15	0	0	0	1986-05-01 12:00:00	51.3888	30.0988	2500
1986-05-01 09:00:00	51.3888	30.0988	2500	0.000766906	9.835e-07	9.53607e-10	0.000663461	0	0	0	0	0	2.98054e-39	0	0	1986-05-01 12:00:00	51.3888	30.0988	3000
1986-05-01 12:00:00	51.3888	30.0988	0	7.39713e-05	0.00174133	0.00232041	5.89881e-05	0.000105898	0.039656	1.92805e-05	0.0013638	0.000276437	0.000552874	0.000737165	0.000276437	1986-05-01 15:00:00	51.3888	30.0988	500
1986-05-01 12:00:00	51.3888	30.0988	500	0	1.03567e-06	1.00662e-09	0	0	0	0	0	0	2.35891e-37	0	0	1986-05-01 15:00:00	51.3888	30.0988	1000
1986-05-01 12:00:00	51.3888	30.0988	1000	0	1.00786e-06	1.03218e-09	0	0	0	0	0	5.10693e-13	0	0	0	1986-05-01 15:00:00	51.3888	30.0988	1500
1986-05-01 12:00:00	51.3888	30.0988	1500	0	9.48905e-07	1.05708e-09	0	0	0	0	0	0	2.16596e-24	0	0	1986-05-01 15:00:00	51.3888	30.0988	2000
1986-05-01 12:00:00	51.3888	30.0988	2000	0.00429741	8.6294e-07	1.08131e-09	5.8324e-06	0	0	0	0	0	0	0	0	1986-05-01 15:00:00	51.3888	30.0988	2500
1986-05-01 12:00:00	51.3888	30.0988	2500	0.0168655	7.5434e-07	1.10485e-09	0	0	0	0	1.34996e-05	7.46718e-13	1.98879e-11	0	0	1986-05-01 15:00:00	51.3888	30.0988	3000
1986-05-01 15:00:00	51.3888	30.0988	0	3.61885e-06	0.00174093	0.00232041	5.36469e-05	0.000166027	0.039656	0.000194594	0.00286293	0.000276437	0.000552874	0.000737165	0.000276437	1986-05-01 18:00:00	51.3888	30.0988	500
1986-05-01 15:00:00	51.3888	30.0988	500	0	4.86944e-07	1.14982e-09	0	0	0	0	0	0	1.46229e-24	0	0	1986-05-01 18:00:00	51.3888	30.0988	1000
1986-05-01 15:00:00	51.3888	30.0988	1000	0	3.37341e-07	1.17121e-09	0	0.0118277	0	0.0279491	0	0	1.75917e-25	0	0	1986-05-01 18:00:00	51.3888	30.0988	1500
1986-05-01 15:00:00	51.3888	30.0988	1500	0	1.84335e-07	1.19185e-09	0.00687369	0	0	0	0	0	8.1786e-25	0	0	1986-05-01 18:00:00	51.3888	30.0988	2000
1986-05-01 15:00:00	51.3888	30.0988	2000	0	3.52155e-08	1.21173e-09	3.7628e-06	0	0	0	0	3.62436e-11	0	0	0	1986-05-01 18:00:00	51.3888	30.0988	2500
1986-05-01 15:00:00	51.3888	30.0988	2500	0.00787598	0	1.23084e-09	0	0	0	0	0	5.00693e-12	7.50962e-12	0	0	1986-05-01 18:00:00	51.3888	30.0988	3000
1986-05-01 18:00:00	51.3888	30.0988	0	7.72297e-05	0.00174008	0.00232041	1.58337e-05	9.16813e-05	0.039656	0.000107565	0.0253319	0.000276437	0.000552874	0.000737165	0.000276437	1986-05-01 21:00:00	51.3888	30.0988	500
1986-05-01 18:00:00	51.3888	30.0988	500	0	0	1.26666e-09	0.000489207	0.00030511	0	0.0149064	0	0	8.95402e-11	0	0	1986-05-01 21:00:00	51.3888	30.0988	1000
1986-05-01 18:00:00	51.3888	30.0988	1000	0	0	1.28336e-09	0	0	0	0.00221339	0	0	0	0	0	1986-05-01 21:00:00	51.3888	30.0988	1500
1986-05-01 18:00:00	51.3888	30.0988	1500	0	0	1.29924e-09	0	0	0	0	0	0	1.57318e-23	0	0	1986-05-01 21:00:00	51.3888	30.0988	2000
1986-05-01 18:00:00	51.3888	30.0988	2000	0.00154175	0	1.31427e-09	0	0.0152526	0	0.029129	0	0	0	0	0	1986-05-01 21:00:00	51.3888	30.0988	2500
1986-05-01 18:00:00	51.3888	30.0988	2500	0.00123372	0	1.32846e-09	0	0	0	0	0	1.67446e-11	0	0	0	1986-05-01 21:00:00	51.3888	30.0988	3000
1986-05-01 21:00:00	51.3888	30.0988	0	7.47569e-06	0.00279508	0.0037271	4.39719e-05	0.00025593	0.0660954	0.000405362	0.00105532	0.000460652	0.000921305	0.00122841	0.000460652	1986-05-02	51.3888	30.0988	500
1986-05-01 21:00:00	51.3888	30.0988	500	0	0	1.35425e-09	6.68586e-07	0.0156632	0	0.0393164	0	2.12658e-11	0	0	0	1986-05-02	51.3888	30.0988	1000
1986-05-01 21:00:00	51.3888	30.0988	1000	0	0	1.36583e-09	0	0.0340236	0	0.0192085	0.191162	0	4.09313e-11	0	0	1986-05-02	51.3888	30.0988	1500
1986-05-01 21:00:00	51.3888	30.0988	1500	0	4.12817e-08	1.37652e-09	0	0.00162883	0	0.00914632	0	0	0	0	0	1986-05-02	51.3888	30.0988	2000
1986-05-01 21:00:00	51.3888	30.0988	2000	0	1.30961e-07	1.38632e-09	0	0	0	0	0	0	4.45776e-24	0	0	1986-05-02	51.3888	30.0988	2500
1986-05-01 21:00:00	51.3888	30.0988	2500	0.000130556	2.05109e-07	1.39521e-09	0	0	0	0.0212848	0	6.88768e-10	6.01441e-36	0	0	1986-05-02	51.3888	30.0988	3000
1986-05-02	51.3888	30.0988	0	0.000116379	0.00332297	0.00443028	6.35714e-05	0.000156373	0.079312	0.000907591	0.000200971	0.000552738	0.00110548	0.00147397	0.000552738	1986-05-02 03:00:00	51.3888	30.0988	500
1986-05-02	51.3888	30.0988	500	0	2.92613e-07	1.41025e-09	0	0.287154	0	0.105042	0	0	9.08866e-23	0	0	1986-05-02 03:00:00	51.3888	30.0988	1000
1986-05-02	51.3888	30.0988	1000	0	3.0447e-07	1.41639e-09	0	0.000863233	0	0.0397776	0	0	0	0	0	1986-05-02 03:00:00	51.3888	30.0988	1500
1986-05-02	51.3888	30.0988	1500	0	2.95851e-07	1.4216e-09	0	0	0	0	0	4.47057e-11	8.34524e-10	0	0	1986-05-02 03:00:00	51.3888	30.0988	2000
1986-05-02	51.3888	30.0988	2000	0	2.68556e-07	1.42588e-09	0	0	0	0.000645205	0	0	0	0	0	1986-05-02 03:00:00	51.3888	30.0988	2500
1986-05-02	51.3888	30.0988	2500	0	2.24855e-07	1.42922e-09	0	0	0	0	0.0121113	1.82133e-12	9.08866e-23	0	0	1986-05-02 03:00:00	51.3888	30.0988	3000
1986-05-02 03:00:00	51.3888	30.0988	0	7.64874e-05	0.00332288	0.00443028	9.41413e-05	4.04736e-05	0.079312	0.000213252	0.000213974	0.000552738	0.00110548	0.00147397	0.000552738	1986-05-02 06:00:00	51.3888	30.0988	500
1986-05-02 03:00:00	51.3888	30.0988	500	0	9.84595e-08	1.43307e-09	0	0	0	0	0	2.91016e-10	9.89832e-36	0	0	1986-05-02 06:00:00	51.3888	30.0988	1000
1986-05-02 03:00:00	51.3888	30.0988	1000	0	2.23846e-08	1.43358e-09	0	0	0	0	0	0	0	0	0	1986-05-02 06:00:00	51.3888	30.0988	1500
1986-05-02 03:00:00	51.3888	30.0988	1500	0	0	1.43314e-09	0	0.00532886	0	0.0860426	0	0	1.07801e-48	0	0	1986-05-02 06:00:00	51.3888	30.0988	2000
1986-05-02 03:00:00	51.3888	30.0988	2000	0	0	1.43176e-09	0	0	0	0	0	0	0	0	0	1986-05-02 06:00:00	51.3888	30.0988	2500
1986-05-02 03:00:00	51.3888	30.0988	2500	0	0	1.42942e-09	0	0.0100788	0	0.0336259	0.00538199	1.82093e-10	0	0	0	1986-05-02 06:00:00	51.3888	30.0988	3000
1986-05-02 06:00:00	51.3888	30.0988	0	9.97906e-06	0.00332248	0.00443028	4.31927e-06	7.42325e-06	0.079312	8.74072e-05	0.000211934	0.000552738	0.00110548	0.00147397	0.000552738	1986-05-02 09:00:00	51.3888	30.0988	500
1986-05-02 06:00:00	51.3888	30.0988	500	0	0	1.4219e-09	0	0	0	0	0	0	0	0	0	1986-05-02 09:00:00	51.3888	30.0988	1000
1986-05-02 06:00:00	51.3888	30.0988	1000	0	0	1.41672e-09	0	0	0	0	0	0	0	0	0	1986-05-02 09:00:00	51.3888	30.0988	1500
1986-05-02 06:00:00	51.3888	30.0988	1500	0	0	1.41059e-09	0	0	0	0.000744723	0.0187675	0	0	0	0	1986-05-02 09:00:00	51.3888	30.0988	2000
1986-05-02 06:00:00	51.3888	30.0988	2000	0	0	1.40353e-09	0	0	0	0.00777142	0.0394371	0	0	0	0	1986-05-02 09:00:00	51.3888	30.0988	2500
1986-05-02 06:00:00	51.3888	30.0988	2500	0	0	1.39552e-09	0	0	0	0	0	0	0	0	0	1986-05-02 09:00:00	51.3888	30.0988	3000
1986-05-02 09:00:00	51.3888	30.0988	0	1.66769e-05	0.00332277	0.00443028	6.61058e-05	0.000172403	0.079312	6.60594e-05	0.000170945	0.000552738	0.00110548	0.00147397	0.000552738	1986-05-02 12:00:00	51.3888	30.0988	500
1986-05-02 09:00:00	51.3888	30.0988	500	0	1.72839e-07	1.37671e-09	0	0	0	0	0	0	0	0	0	1986-05-02 12:00:00	51.3888	30.0988	1000
1986-05-02 09:00:00	51.3888	30.0988	1000	0	2.9047e-07	1.36592e-09	0	0	0	0	0	0	0	0	0	1986-05-02 12:00:00	51.3888	30.0988	1500
1986-05-02 09:00:00	51.3888	30.0988	1500	0	4.03867e-07	1.35421e-09	0	0	0	0	0	0	0	0	0	1986-05-02 12:00:00	51.3888	30.0988	2000
1986-05-02 09:00:00	51.3888	30.0988	2000	0	5.08287e-07	1.34159e-09	0	0	0	0	0	0	0	0	0	1986-05-02 12:00:00	51.3888	30.0988	2500
1986-05-02 09:00:00	51.3888	30.0988	2500	0	6.00835e-07	1.32807e-09	0	0	0	0	0	0	0	0	0	1986-05-02 12:00:00	51.3888	30.0988	3000
1986-05-02 12:00:00	51.3888	30.0988	0	5.63493e-05	0.00332339	0.00443028	0.000100917	0.000202375	0.079312	2.12172e-05	8.57011e-05	0.000552738	0.00110548	0.00147397	0.000552738	1986-05-02 15:00:00	51.3888	30.0988	500
1986-05-02 12:00:00	51.3888	30.0988	500	0	7.461e-07	1.29835e-09	0	0	0	0	0	0	0	0	0	1986-05-02 15:00:00	51.3888	30.0988	1000
1986-05-02 12:00:00	51.3888	30.0988	1000	0	7.97511e-07	1.28218e-09	0	0	0	0	0	0	0	0	0	1986-05-02 15:00:00	51.3888	30.0988	1500
1986-05-02 12:00:00	51.3888	30.0988	1500	0	8.34287e-07	1.26515e-09	0	0	0	0	0	0	0	0	0	1986-05-02 15:00:00	51.3888	30.0988	2000
1986-05-02 12:00:00	51.3888	30.0988	2000	0	8.56321e-07	1.24727e-09	0	0.000354176	0	0	0	0	0	0	0	1986-05-02 15:00:00	51.3888	30.0988	2500
1986-05-02 12:00:00	51.3888	30.0988	2500	0	8.63722e-07	1.22855e-09	0	0	0	0	0	0	0	0	0	1986-05-02 15:00:00	51.3888	30.0988	3000
1986-05-02 15:00:00	51.3888	30.0988	0	8.42659e-05	0.00332357	0.00443028	7.09577e-05	0.000325711	0.079312	0.000318354	7.30664e-05	0.000552738	0.00110548	0.00147397	0.000552738	1986-05-02 18:00:00	51.3888	30.0988	500
1986-05-02 15:00:00	51.3888	30.0988	500	0	8.35622e-07	1.18866e-09	8.33155e-05	0	0	0	0	0	6.64257e-50	0	0	1986-05-02 18:00:00	51.3888	30.0988	1000
1986-05-02 15:00:00	51.3888	30.0988	1000	0	8.00762e-07	1.16751e-09	0	0	0	0	0.0273982	0	2.31919e-44	0	0	1986-05-02 18:00:00	51.3888	30.0988	1500
1986-05-02 15:00:00	51.3888	30.0988	1500	0	7.52677e-07	1.14557e-09	0	0	0	0	0.0180276	0	6.09923e-37	0	0	1986-05-02 18:00:00	51.3888	30.0988	2000
1986-05-02 15:00:00	51.3888	30.0988	2000	0	6.91999e-07	1.12287e-09	0.000161237	0	0	0	0	0	2.12952e-31	0	1.23864e-55	1986-05-02 18:00:00	51.3888	30.0988	2500
1986-05-02 15:00:00	51.3888	30.0988	2500	0.00276419	6.19384e-07	1.09942e-09	0	0	0	0	0	0	5.60033e-24	0	0	1986-05-02 18:00:00	51.3888	30.0988	3000
1986-05-02 18:00:00	51.3888	30.0988	0	0.000104353	0.00332324	0.00443028	7.35763e-06	4.37208e-05	0.079312	0.000392903	0.000153109	0.000552738	0.00110548	0.00147397	0.000552738	1986-05-02 21:00:00	51.3888	30.0988	500
1986-05-02 18:00:00	51.3888	30.0988	500	0	4.40969e-07	1.05031e-09	1.12395e-07	0	0	0	0.0113873	6.17886e-07	5.14224e-11	0	2.82578e-31	1986-05-02 21:00:00	51.3888	30.0988	1000
1986-05-02 18:00:00	51.3888	30.0988	1000	0	3.36656e-07	1.02469e-09	0	0.171121	0	0.798031	0	8.31604e-06	1.79543e-05	0	1.61164e-07	1986-05-02 21:00:00	51.3888	30.0988	1500
1986-05-02 18:00:00	51.3888	30.0988	1500	0	2.23515e-07	9.98386e-10	0	0	0	0	0	0	0	0	2.82578e-31	1986-05-02 21:00:00	51.3888	30.0988	2000
1986-05-02 18:00:00	51.3888	30.0988	2000	0	1.05947e-07	9.71407e-10	0	0	0	0	0	0	1.23384e-10	0	0	1986-05-02 21:00:00	51.3888	30.0988	2500
1986-05-02 18:00:00	51.3888	30.0988	2500	0	0	9.43773e-10	0.00685485	0	0	0	0	0	0	0	0	1986-05-02 21:00:00	51.3888	30.0988	3000
1986-05-02 21:00:00	51.3888	30.0988	0	6.40208e-05	0.0039556	0.0052743	2.11372e-05	0.000260581	0.0933145	0.000480317	0.000192334	0.000647598	0.0012952	0.00172693	0.000647598	1986-05-03	51.3888	30.0988	500
1986-05-02 21:00:00	51.3888	30.0988	500	0	0	8.86614e-10	6.60283e-05	0	0	0	0.00284799	8.73384e-10	1.87156e-10	0	2.13533e-12	1986-05-03	51.3888	30.0988	1000
1986-05-02 21:00:00	51.3888	30.0988	1000	0	0	8.57127e-10	0	0.144125	0	0	0.0637728	8.61955e-06	0	0	0	1986-05-03	51.3888	30.0988	1500
1986-05-02 21:00:00	51.3888	30.0988	1500	0	0	8.27061e-10	0	0	0	0	0.100652	0	1.12729e-20	0	0	1986-05-03	51.3888	30.0988	2000
1986-05-02 21:00:00	51.3888	30.0988	2000	0	0	7.96434e-10	0	0	0	0	0	3.18292e-10	0	0	2.0042e-32	1986-05-03	51.3888	30.0988	2500
1986-05-02 21:00:00	51.3888	30.0988	2500	0	0	7.65267e-10	0	0	0	0	0	1.88592e-12	7.09197e-22	0	1.23504e-55	1986-05-03	51.3888	30.0988	3000
1986-05-03	51.3888	30.0988	0	5.03854e-05	0.00427179	0.0056962	0.000177935	8.82534e-05	0.100314	0.0012451	0.000114782	0.000695017	0.00139003	0.00185338	0.000695017	1986-05-03 03:00:00	51.3888	30.0988	500
1986-05-03	51.3888	30.0988	500	0	0	7.01392e-10	0.00308143	0	0	0	0.000908762	6.00232e-07	6.51186e-09	1.80938e-11	0	1986-05-03 03:00:00	51.3888	30.0988	1000
1986-05-03	51.3888	30.0988	1000	0	0	6.68726e-10	0	0	0	0	0	0	0	3.24293e-11	0	1986-05-03 03:00:00	51.3888	30.0988	1500
1986-05-03	51.3888	30.0988	1500	0	0	6.35602e-10	0	0	0	0	0	0	0	4.67617e-11	0	1986-05-03 03:00:00	51.3888	30.0988	2000
1986-05-03	51.3888	30.0988	2000	0	0	6.02042e-10	0	0	0	0	0	1.27458e-05	3.2669e-06	6.10827e-11	2.66273e-08	1986-05-03 03:00:00	51.3888	30.0988	2500
1986-05-03	51.3888	30.0988	2500	0	1.64092e-08	5.68067e-10	0	0	0	0	0	0	5.55518e-05	7.53839e-11	1.30093e-06	1986-05-03 03:00:00	51.3888	30.0988	3000
1986-05-03 03:00:00	51.3888	30.0988	0	9.61205e-05	0.00427226	0.0056962	0.000150645	0.000215646	0.100314	0.000517137	0.000295936	0.000642693	0.00127082	0.00185338	0.000692218	1986-05-03 06:00:00	51.3888	30.0988	500
1986-05-03 03:00:00	51.3888	30.0988	500	0	1.92676e-07	4.98964e-10	0	0	0	0	0	0	0	1.03894e-10	0	1986-05-03 06:00:00	51.3888	30.0988	1000
1986-05-03 03:00:00	51.3888	30.0988	1000	0	2.63283e-07	4.63881e-10	0	0	0	0	0	0	0	1.18086e-10	0	1986-05-03 06:00:00	51.3888	30.0988	1500
1986-05-03 03:00:00	51.3888	30.0988	1500	0	3.16529e-07	4.28473e-10	0	0	0	0	0	0	0	1.32226e-10	0	1986-05-03 06:00:00	51.3888	30.0988	2000
1986-05-03 03:00:00	51.3888	30.0988	2000	0	3.50255e-07	3.92765e-10	0	0	0	0	0	0	5.80702e-05	1.46305e-10	0	1986-05-03 06:00:00	51.3888	30.0988	2500
1986-05-03 03:00:00	51.3888	30.0988	2500	0	3.63332e-07	3.56779e-10	0.0656448	0	0	0	0	0	0	1.60315e-10	0	1986-05-03 06:00:00	51.3888	30.0988	3000
1986-05-03 06:00:00	51.3888	30.0988	0	7.72175e-05	0.00427251	0.0056962	2.64247e-05	0.000223348	0.100314	0.00103279	0.000357276	0.000455482	0.000765913	0.00185338	0.000672972	1986-05-03 09:00:00	51.3888	30.0988	500
1986-05-03 06:00:00	51.3888	30.0988	500	0	3.27791e-07	2.84071e-10	0	0	0	0	0	0	0	1.88097e-10	0	1986-05-03 09:00:00	51.3888	30.0988	1000
1986-05-03 06:00:00	51.3888	30.0988	1000	0	2.80556e-07	2.47396e-10	0	0	0	0	0	0	0	2.01853e-10	0	1986-05-03 09:00:00	51.3888	30.0988	1500
1986-05-03 06:00:00	51.3888	30.0988	1500	0	2.15533e-07	2.1054e-10	0	0	0	0	0	0	0	2.1551e-10	0	1986-05-03 09:00:00	51.3888	30.0988	2000
1986-05-03 06:00:00	51.3888	30.0988	2000	0	1.36037e-07	1.73526e-10	0	0	0	0	0	0	5.26896e-05	2.29058e-10	0	1986-05-03 09:00:00	51.3888	30.0988	2500
1986-05-03 06:00:00	51.3888	30.0988	2500	0	4.65931e-08	1.3638e-10	0	0	0	0	0	1.16485e-05	8.20376e-05	2.42491e-10	0	1986-05-03 09:00:00	51.3888	30.0988	3000
1986-05-03 09:00:00	51.3888	30.0988	0	0.000146443	0.0042721	0.0056962	0.000176744	0.00019695	0.100314	0.00104293	0.000399552	0.000558381	0.000947431	0.00185338	0.000662626	1986-05-03 12:00:00	51.3888	30.0988	500
1986-05-03 09:00:00	51.3888	30.0988	500	0	0	6.17846e-11	0	0	0	0	0	0	0	2.68981e-10	0	1986-05-03 12:00:00	51.3888	30.0988	1000
1986-05-03 09:00:00	51.3888	30.0988	1000	0	0	2.43854e-11	0	0	0	0	0	0	0	2.82023e-10	0	1986-05-03 12:00:00	51.3888	30.0988	1500
1986-05-03 09:00:00	51.3888	30.0988	1500	0	0	0	0	0	0	0	0.00799098	0	0	2.9492e-10	0	1986-05-03 12:00:00	51.3888	30.0988	2000
1986-05-03 09:00:00	51.3888	30.0988	2000	0	0	0	0	0	0	0	0.0004939	0	0	3.07665e-10	0	1986-05-03 12:00:00	51.3888	30.0988	2500
1986-05-03 09:00:00	51.3888	30.0988	2500	0	0	0	0	0	0	0	0	0	0	3.20251e-10	0	1986-05-03 12:00:00	51.3888	30.0988	3000
1986-05-03 12:00:00	51.3888	30.0988	0	6.35542e-05	0.00427173	0.0056962	4.13584e-05	0.000350417	0.100314	0.00121948	0.000103688	0.000598257	0.00124266	0.00185338	0.00066527	1986-05-03 15:00:00	51.3888	30.0988	500
1986-05-03 12:00:00	51.3888	30.0988	500	0	0	0	0	0	0	0	0	0	0	3.44921e-10	0	1986-05-03 15:00:00	51.3888	30.0988	1000
1986-05-03 12:00:00	51.3888	30.0988	1000	0	0	0	0	0	0	0	0	0	0	3.56992e-10	0	1986-05-03 15:00:00	51.3888	30.0988	1500
1986-05-03 12:00:00	51.3888	30.0988	1500	0	0	0	0	0	0	0	0.0178548	0	0	3.68877e-10	0	1986-05-03 15:00:00	51.3888	30.0988	2000
1986-05-03 12:00:00	51.3888	30.0988	2000	0	0	0	0	0	0	0	0.0647056	0	0	3.80572e-10	0	1986-05-03 15:00:00	51.3888	30.0988	2500
1986-05-03 12:00:00	51.3888	30.0988	2500	0	0	0	0	0	0	0	0	0	2.84781e-16	3.92069e-10	0	1986-05-03 15:00:00	51.3888	30.0988	3000
1986-05-03 15:00:00	51.3888	30.0988	0	0.000155031	0.00427212	0.0056962	0.000107214	0.000280302	0.100314	0.000840788	0.000174797	0.000480007	0.00073633	0.00185338	0.000628433	1986-05-03 18:00:00	51.3888	30.0988	500
1986-05-03 15:00:00	51.3888	30.0988	500	0	7.50502e-08	0	0	0	0	0	0	0	0	4.14447e-10	0	1986-05-03 18:00:00	51.3888	30.0988	1000
1986-05-03 15:00:00	51.3888	30.0988	1000	0	1.81885e-07	0	0	0	0	0	0	0	0	4.25318e-10	0	1986-05-03 18:00:00	51.3888	30.0988	1500
1986-05-03 15:00:00	51.3888	30.0988	1500	0	2.78541e-07	0	0	0	0	0	0.0370767	0	0	4.35967e-10	0	1986-05-03 18:00:00	51.3888	30.0988	2000
1986-05-03 15:00:00	51.3888	30.0988	2000	0	3.61078e-07	0	0	0	0	0	0	1.36264e-10	0	4.46392e-10	0	1986-05-03 18:00:00	51.3888	30.0988	2500
1986-05-03 15:00:00	51.3888	30.0988	2500	0	4.27632e-07	0	0	0	0	0	0	0	5.95447e-16	4.56585e-10	0	1986-05-03 18:00:00	51.3888	30.0988	3000
1986-05-03 18:00:00	51.3888	30.0988	0	0.000130374	0.00427263	0.0056962	0.000117734	3.86986e-05	0.100314	0.000109209	6.64756e-05	5.82968e-05	2.31929e-05	0.00185338	0.000520412	1986-05-03 21:00:00	51.3888	30.0988	500
1986-05-03 18:00:00	51.3888	30.0988	500	0	5.14508e-07	0	0	0	0	0	0	0	0	4.7626e-10	0	1986-05-03 21:00:00	51.3888	30.0988	1000
1986-05-03 18:00:00	51.3888	30.0988	1000	0.0163376	5.36701e-07	0	0	0	0	0	0	0	0	4.85732e-10	0	1986-05-03 21:00:00	51.3888	30.0988	1500
1986-05-03 18:00:00	51.3888	30.0988	1500	0	5.45411e-07	0	0	0	0	0	0	0	0	4.94955e-10	0	1986-05-03 21:00:00	51.3888	30.0988	2000
1986-05-03 18:00:00	51.3888	30.0988	2000	0	5.40942e-07	0	0	0	0	0	0	0	0	5.03925e-10	0	1986-05-03 21:00:00	51.3888	30.0988	2500
1986-05-03 18:00:00	51.3888	30.0988	2500	0	5.24691e-07	0	0	0	0	0	0	1.40304e-09	7.92021e-16	5.12637e-10	0	1986-05-03 21:00:00	51.3888	30.0988	3000
1986-05-03 21:00:00	51.3888	30.0988	0	0.000195141	0.00553868	0.00738423	0.000197108	0.000325068	0.128306	0.000459581	0.000124407	8.27641e-05	1.41825e-05	0.00244301	0.000738351	1986-05-04	51.3888	30.0988	500
1986-05-03 21:00:00	51.3888	30.0988	500	0	4.6362e-07	0	0	0.128074	0	0.396984	0.0480577	0	0	5.29276e-10	0	1986-05-04	51.3888	30.0988	1000
1986-05-03 21:00:00	51.3888	30.0988	1000	0	4.22004e-07	0	0	5.7654e-06	0	0	0.151036	0	0	5.37195e-10	0	1986-05-04	51.3888	30.0988	1500
1986-05-03 21:00:00	51.3888	30.0988	1500	0	3.74451e-07	0	0	0.0347273	0	0	0	0	0	5.44844e-10	0	1986-05-04	51.3888	30.0988	2000
1986-05-03 21:00:00	51.3888	30.0988	2000	0	3.21487e-07	0	0	0	0	0	0	0	0	5.52219e-10	0	1986-05-04	51.3888	30.0988	2500
1986-05-03 21:00:00	51.3888	30.0988	2500	0	2.6381e-07	0	0	0	0	0	0	0	0	5.59318e-10	0	1986-05-04	51.3888	30.0988	3000
1986-05-04	51.3888	30.0988	0	0.000112565	0.00617124	0.00822805	0.000141302	0.000566286	0.142298	0.000115126	0.000364551	3.25944e-05	2.20307e-05	0.00273776	0.000766101	1986-05-04 03:00:00	51.3888	30.0988	500
1986-05-04	51.3888	30.0988	500	0	1.39634e-07	0	0	0	0	0	0	0	0	5.72679e-10	0	1986-05-04 03:00:00	51.3888	30.0988	1000
1986-05-04	51.3888	30.0988	1000	0	7.67159e-08	0	0	0	0	0	0	0	0	5.78937e-10	0	1986-05-04 03:00:00	51.3888	30.0988	1500
1986-05-04	51.3888	30.0988	1500	0	1.54936e-08	0	0	0	0	0	0	0	0	5.8491e-10	0	1986-05-04 03:00:00	51.3888	30.0988	2000
1986-05-04	51.3888	30.0988	2000	0	0	0	0	0	0	0	0	0	0	5.90596e-10	0	1986-05-04 03:00:00	51.3888	30.0988	2500
1986-05-04	51.3888	30.0988	2500	0	0	0	0	0	0	0	0	0	0	5.95995e-10	0	1986-05-04 03:00:00	51.3888	30.0988	3000
1986-05-04 03:00:00	51.3888	30.0988	0	0.000117815	0.0061709	0.00822805	3.96668e-05	7.80577e-05	0.142298	0.00165247	0.000307504	0.000102888	0.000115882	0.00273776	0.000694836	1986-05-04 06:00:00	51.3888	30.0988	500
1986-05-04 03:00:00	51.3888	30.0988	500	0	0	0	0	0	0	0	0	0	0	6.05924e-10	0	1986-05-04 06:00:00	51.3888	30.0988	1000
1986-05-04 03:00:00	51.3888	30.0988	1000	0	0	0	0	0	0	0	0	0	0	6.1045e-10	0	1986-05-04 06:00:00	51.3888	30.0988	1500
1986-05-04 03:00:00	51.3888	30.0988	1500	0	0	0	0	0	0	0	0	0	0	6.14683e-10	0	1986-05-04 06:00:00	51.3888	30.0988	2000
1986-05-04 03:00:00	51.3888	30.0988	2000	0	0	0	0	0.133914	0	0.0282383	0.027697	0	0	6.18621e-10	0	1986-05-04 06:00:00	51.3888	30.0988	2500
1986-05-04 03:00:00	51.3888	30.0988	2500	0	0	0	0	0.0451819	0	0.548687	0	0	0	6.22264e-10	0	1986-05-04 06:00:00	51.3888	30.0988	3000
1986-05-04 06:00:00	51.3888	30.0988	0	0.000103973	0.0061708	0.00822805	0.000197897	0.00064164	0.142298	0.00131973	0.000159376	0.000426041	0.000672421	0.00273776	0.000895279	1986-05-04 09:00:00	51.3888	30.0988	500
1986-05-04 06:00:00	51.3888	30.0988	500	0	0	0	0	0	0	0	0	0	0	6.28666e-10	0	1986-05-04 09:00:00	51.3888	30.0988	1000
1986-05-04 06:00:00	51.3888	30.0988	1000	0	0	0	0	0	0	0	0	0	0	6.31424e-10	0	1986-05-04 09:00:00	51.3888	30.0988	1500
1986-05-04 06:00:00	51.3888	30.0988	1500	0	0	0	0	0	0	0	0	0	0	6.33888e-10	0	1986-05-04 09:00:00	51.3888	30.0988	2000
1986-05-04 06:00:00	51.3888	30.0988	2000	0	0	0	0	0	0	0	0	0	0	6.36059e-10	0	1986-05-04 09:00:00	51.3888	30.0988	2500
1986-05-04 06:00:00	51.3888	30.0988	2500	0.00591324	0	0	0.00751387	0.23844	0	0.154101	0	0	0	6.37935e-10	0	1986-05-04 09:00:00	51.3888	30.0988	3000
1986-05-04 09:00:00	51.3888	30.0988	0	0.000181435	0.00617099	0.00822805	4.28656e-05	0.0005155	0.142298	0.00178224	0.000528606	3.20336e-05	6.23728e-05	0.00273776	0.000259879	1986-05-04 12:00:00	51.3888	30.0988	500
1986-05-04 09:00:00	51.3888	30.0988	500	0	3.38328e-09	0	0	0	0	0	0	0	0	6.40811e-10	0	1986-05-04 12:00:00	51.3888	30.0988	1000
1986-05-04 09:00:00	51.3888	30.0988	1000	0	4.69122e-08	0	0	0	0	0	0	0	0	6.4181e-10	0	1986-05-04 12:00:00	51.3888	30.0988	1500
1986-05-04 09:00:00	51.3888	30.0988	1500	0	8.45532e-08	0	0	0	0	0	0	0	0	6.42518e-10	0	1986-05-04 12:00:00	51.3888	30.0988	2000
1986-05-04 09:00:00	51.3888	30.0988	2000	0	1.1377e-07	0	0	0	0	0	0	0	0	6.42935e-10	0	1986-05-04 12:00:00	51.3888	30.0988	2500
1986-05-04 09:00:00	51.3888	30.0988	2500	0	1.32478e-07	0	0	0.0987417	0	0	0.0199954	0	0	6.4306e-10	0	1986-05-04 12:00:00	51.3888	30.0988	3000
1986-05-04 12:00:00	51.3888	30.0988	0	0.000143749	0.00617118	0.00822805	0.000133775	0.00053219	0.142298	0.000288839	0.000101972	0.00028299	9.19022e-05	0.00273776	0.00087888	1986-05-04 15:00:00	51.3888	30.0988	500
1986-05-04 12:00:00	51.3888	30.0988	500	0	1.30223e-07	0	0	0	0	0	0	0	0	6.42431e-10	0	1986-05-04 15:00:00	51.3888	30.0988	1000
1986-05-04 12:00:00	51.3888	30.0988	1000	0	1.05849e-07	0	0	0	0	0	0	0	0	6.41677e-10	0	1986-05-04 15:00:00	51.3888	30.0988	1500
1986-05-04 12:00:00	51.3888	30.0988	1500	0	6.60059e-08	0	0	0	0	0	0	0	0	6.40628e-10	0	1986-05-04 15:00:00	51.3888	30.0988	2000
1986-05-04 12:00:00	51.3888	30.0988	2000	0	1.40129e-08	0	0	0	0	0	0	0	0	6.39286e-10	0	1986-05-04 15:00:00	51.3888	30.0988	2500
1986-05-04 12:00:00	51.3888	30.0988	2500	0	0	0	0	0.01706	0	0.889291	0	0	0	6.37649e-10	0	1986-05-04 15:00:00	51.3888	30.0988	3000
1986-05-04 15:00:00	51.3888	30.0988	0	0.000259201	0.00617094	0.00822805	0.000142072	0.000589368	0.142298	0.00115954	0.000333214	0.000207773	0.000153335	0.00273776	0.000753316	1986-05-04 18:00:00	51.3888	30.0988	500
1986-05-04 15:00:00	51.3888	30.0988	500	0	0	0	0	0	0	0	0	0	0	6.33497e-10	0	1986-05-04 18:00:00	51.3888	30.0988	1000
1986-05-04 15:00:00	51.3888	30.0988	1000	0	0	0	0	0	0	0	0	0	0	6.30982e-10	0	1986-05-04 18:00:00	51.3888	30.0988	1500
1986-05-04 15:00:00	51.3888	30.0988	1500	0	0	0	0	0	0	0	0	0	0	6.28176e-10	0	1986-05-04 18:00:00	51.3888	30.0988	2000
1986-05-04 15:00:00	51.3888	30.0988	2000	0	0	0	0	0.00299146	0	0.000593172	0	0	0	6.25079e-10	0	1986-05-04 18:00:00	51.3888	30.0988	2500
1986-05-04 15:00:00	51.3888	30.0988	2500	0	0	0	0	0.0510414	0	0.00282701	0	0	0	6.21694e-10	0	1986-05-04 18:00:00	51.3888	30.0988	3000
1986-05-04 18:00:00	51.3888	30.0988	0	2.94739e-05	0.0061709	0.00822805	4.64421e-05	0.00059666	0.142298	0.0014532	0.000204143	7.05141e-05	0.000224138	0.00273776	0.000340421	1986-05-04 21:00:00	51.3888	30.0988	500
1986-05-04 18:00:00	51.3888	30.0988	500	0.0153095	0	0	0	0	0	0	0	0	0	6.14064e-10	0	1986-05-04 21:00:00	51.3888	30.0988	1000
1986-05-04 18:00:00	51.3888	30.0988	1000	0	1.28871e-08	0	0	0	0	0	0	0	0	6.09824e-10	0	1986-05-04 21:00:00	51.3888	30.0988	1500
1986-05-04 18:00:00	51.3888	30.0988	1500	0	1.02489e-07	0	0	0	0	0	0	0	0	6.05302e-10	0	1986-05-04 21:00:00	51.3888	30.0988	2000
1986-05-04 18:00:00	51.3888	30.0988	2000	0	1.9515e-07	0	0	0.0256215	0	0.000335527	0	0	0	6.005e-10	0	1986-05-04 21:00:00	51.3888	30.0988	2500
1986-05-04 18:00:00	51.3888	30.0988	2500	0	2.86077e-07	0	0	0.0158963	0	0.00170661	0	0	0	5.95421e-10	0	1986-05-04 21:00:00	51.3888	30.0988	3000
1986-05-04 21:00:00	51.3888	30.0988	0	4.02856e-05	0.00670097	0.00893413	0.00025715	0.000200077	0.156274	0.000497337	0.000306204	9.49135e-06	4.75566e-06	0.0028785	0.00051334	1986-05-05	51.3888	30.0988	500
1986-05-04 21:00:00	51.3888	30.0988	500	0	4.46345e-07	0	0	0	0	0	0	0	0	5.8444e-10	0	1986-05-05	51.3888	30.0988	1000
1986-05-04 21:00:00	51.3888	30.0988	1000	0	5.08329e-07	0	0	0	0	0	0	0	0	5.78542e-10	0	1986-05-05	51.3888	30.0988	1500
1986-05-04 21:00:00	51.3888	30.0988	1500	0	5.53773e-07	0	0	0	0	0	0.00024317	0	0	5.72376e-10	0	1986-05-05	51.3888	30.0988	2000
1986-05-04 21:00:00	51.3888	30.0988	2000	0	5.79968e-07	0	0	0	0	0	0.0808077	0	0	5.65944e-10	0	1986-05-05	51.3888	30.0988	2500
1986-05-04 21:00:00	51.3888	30.0988	2500	0	5.84911e-07	0	0	0	0	0.0698271	0	1.76991e-06	3.56851e-05	5.5925e-10	0	1986-05-05	51.3888	30.0988	3000
1986-05-05	51.3888	30.0988	0	0.000152154	0.00696588	0.00928709	0.000287665	0.000262717	0.16326	0.00176979	0.000505916	0.000239147	4.60076e-05	0.00294885	0.000461942	1986-05-05 03:00:00	51.3888	30.0988	500
1986-05-05	51.3888	30.0988	500	0	5.25531e-07	0	0	0	0	0	0.0031922	0	0	5.45085e-10	0	1986-05-05 03:00:00	51.3888	30.0988	1000
1986-05-05	51.3888	30.0988	1000	0	4.59597e-07	0	0.000939851	0	0	0	0	0	0	5.37621e-10	0	1986-05-05 03:00:00	51.3888	30.0988	1500
1986-05-05	51.3888	30.0988	1500	0	3.69578e-07	0	0.00044059	0	0	0	0	0	0	5.29906e-10	0	1986-05-05 03:00:00	51.3888	30.0988	2000
1986-05-05	51.3888	30.0988	2000	0	2.56935e-07	0	0	0	0	0	0.0330184	0	0	5.21944e-10	0	1986-05-05 03:00:00	51.3888	30.0988	2500
1986-05-05	51.3888	30.0988	2500	0	1.27702e-07	0	0	0	0	0	0	0	0	5.1374e-10	0	1986-05-05 03:00:00	51.3888	30.0988	3000
1986-05-05 03:00:00	51.3888	30.0988	0	0.000217067	0.00696531	0.00928709	0.000200701	3.4901e-05	0.16326	0.000669042	0.000155716	0.000518302	0.000438563	0.00294885	0.00100998	1986-05-05 06:00:00	51.3888	30.0988	500
1986-05-05 03:00:00	51.3888	30.0988	500	0	0	0	0	0	0	0	0	0	0	4.96618e-10	0	1986-05-05 06:00:00	51.3888	30.0988	1000
1986-05-05 03:00:00	51.3888	30.0988	1000	0	0	0	0	0	0	0	0	0	0	4.87709e-10	0	1986-05-05 06:00:00	51.3888	30.0988	1500
1986-05-05 03:00:00	51.3888	30.0988	1500	0	0	0	0	0	0	0	0	0	0	4.78575e-10	0	1986-05-05 06:00:00	51.3888	30.0988	2000
1986-05-05 03:00:00	51.3888	30.0988	2000	0	0	0	0.00264215	0	0	0	0.000726836	0	0	4.69218e-10	0	1986-05-05 06:00:00	51.3888	30.0988	2500
1986-05-05 03:00:00	51.3888	30.0988	2500	0.0018936	0	0	0	0	0	0	0	0	0	4.59645e-10	0	1986-05-05 06:00:00	51.3888	30.0988	3000
1986-05-05 06:00:00	51.3888	30.0988	0	6.58473e-05	0.0069653	0.00928709	9.15676e-05	0.000297054	0.16326	0.000316716	0.000403264	0.000550057	0.000482095	0.00294885	0.000904105	1986-05-05 09:00:00	51.3888	30.0988	500
1986-05-05 06:00:00	51.3888	30.0988	500	0	1.24293e-07	0	0	0	0	0	0	0	0	4.39866e-10	0	1986-05-05 09:00:00	51.3888	30.0988	1000
1986-05-05 06:00:00	51.3888	30.0988	1000	0	2.83452e-07	0	0	0	0	0	0	0	0	4.29669e-10	0	1986-05-05 09:00:00	51.3888	30.0988	1500
1986-05-05 06:00:00	51.3888	30.0988	1500	0	4.53544e-07	0	0	0	0	0	0	0	0	4.19274e-10	0	1986-05-05 09:00:00	51.3888	30.0988	2000
1986-05-05 06:00:00	51.3888	30.0988	2000	0	6.27922e-07	0	0	0	0	0	0	0	0	4.08685e-10	0	1986-05-05 09:00:00	51.3888	30.0988	2500
1986-05-05 06:00:00	51.3888	30.0988	2500	0	8.01539e-07	0	0	0.0639987	0	0.383919	0	0	0	3.97906e-10	0	1986-05-05 09:00:00	51.3888	30.0988	3000
1986-05-05 09:00:00	51.3888	30.0988	0	3.35803e-05	0.00696629	0.00928709	6.68181e-05	0.000294488	0.16326	0.000787621	0.000544594	0.000209865	6.97044e-05	0.00294885	0.000907805	1986-05-05 12:00:00	51.3888	30.0988	500
1986-05-05 09:00:00	51.3888	30.0988	500	0	1.13385e-06	0	0	0	0	0	0	0	0	3.75802e-10	0	1986-05-05 12:00:00	51.3888	30.0988	1000
1986-05-05 09:00:00	51.3888	30.0988	1000	0	1.28803e-06	0	0	0	0	0	0	0	0	3.64485e-10	0	1986-05-05 12:00:00	51.3888	30.0988	1500
1986-05-05 09:00:00	51.3888	30.0988	1500	0	1.43172e-06	0	0	0	0	0	0	0	0	3.53e-10	0	1986-05-05 12:00:00	51.3888	30.0988	2000
1986-05-05 09:00:00	51.3888	30.0988	2000	0	1.56346e-06	0	0	0	0	0	0	0	0	3.4135e-10	0	1986-05-05 12:00:00	51.3888	30.0988	2500
1986-05-05 09:00:00	51.3888	30.0988	2500	0	1.68211e-06	0	0	0	0	0	0	0	0	3.29542e-10	0	1986-05-05 12:00:00	51.3888	30.0988	3000
1986-05-05 12:00:00	51.3888	30.0988	0	0.000141983	0.0069671	0.00928709	8.65394e-05	6.72014e-05	0.16326	0.000317624	0.000278272	0.000207492	0.000292591	0.00294885	0.000716266	1986-05-05 15:00:00	51.3888	30.0988	500
1986-05-05 12:00:00	51.3888	30.0988	500	0	1.87666e-06	0	0	0	0	0	0	0	0	3.05473e-10	0	1986-05-05 15:00:00	51.3888	30.0988	1000
1986-05-05 12:00:00	51.3888	30.0988	1000	0	1.95105e-06	0	0	0	0	0	0	0	0	2.93223e-10	0	1986-05-05 15:00:00	51.3888	30.0988	1500
1986-05-05 12:00:00	51.3888	30.0988	1500	0	2.00948e-06	0	0	0	0	0	0	0	0	2.80836e-10	0	1986-05-05 15:00:00	51.3888	30.0988	2000
1986-05-05 12:00:00	51.3888	30.0988	2000	0	2.05164e-06	0	0	0	0	0	0	0	0	2.68319e-10	0	1986-05-05 15:00:00	51.3888	30.0988	2500
1986-05-05 12:00:00	51.3888	30.0988	2500	0	2.0774e-06	0	0	0	0	0	0	0	0	2.55677e-10	0	1986-05-05 15:00:00	51.3888	30.0988	3000
1986-05-05 15:00:00	51.3888	30.0988	0	0.000141546	0.0069674	0.00928709	0.000185616	0.000220496	0.16326	0.000302434	0.000494523	0.000273167	1.04159e-05	0.00294885	0.00076285	1986-05-05 18:00:00	51.3888	30.0988	500
1986-05-05 15:00:00	51.3888	30.0988	500	0	2.07979e-06	0	0	0	0	0	0	0	0	2.30044e-10	0	1986-05-05 18:00:00	51.3888	30.0988	1000
1986-05-05 15:00:00	51.3888	30.0988	1000	0	2.05666e-06	0	0	0	0	0	0	0	0	2.17065e-10	0	1986-05-05 18:00:00	51.3888	30.0988	1500
1986-05-05 15:00:00	51.3888	30.0988	1500	0	2.01767e-06	0	0	0	0	0	0	0	0	2.03985e-10	0	1986-05-05 18:00:00	51.3888	30.0988	2000
1986-05-05 15:00:00	51.3888	30.0988	2000	0	1.96321e-06	0	0	0	0	0	0	0	0	1.90811e-10	0	1986-05-05 18:00:00	51.3888	30.0988	2500
1986-05-05 15:00:00	51.3888	30.0988	2500	0	1.8938e-06	0	2.82285e-05	0	0	0	0	0	0	1.77549e-10	6.96834e-10	1986-05-05 18:00:00	51.3888	30.0988	3000
1986-05-05 18:00:00	51.3888	30.0988	0	0.000254799	0.00696713	0.00928709	6.62733e-05	0.000125246	0.16326	0.000189922	0.000245442	0.00100538	0.0016862	0.00294885	0.00107279	1986-05-05 21:00:00	51.3888	30.0988	500
1986-05-05 18:00:00	51.3888	30.0988	500	0	1.71257e-06	0	0	0	0	0	0	0	0	1.50787e-10	0	1986-05-05 21:00:00	51.3888	30.0988	1000
1986-05-05 18:00:00	51.3888	30.0988	1000	0	1.60218e-06	0	0	0	0	0	0	0	0	1.37299e-10	0	1986-05-05 21:00:00	51.3888	30.0988	1500
1986-05-05 18:00:00	51.3888	30.0988	1500	0	1.47965e-06	0	0	0	0	0	0	0	0	1.23748e-10	0	1986-05-05 21:00:00	51.3888	30.0988	2000
1986-05-05 18:00:00	51.3888	30.0988	2000	0	1.34583e-06	0	2.28871e-07	0	0	0	0	0	0	1.1014e-10	0	1986-05-05 21:00:00	51.3888	30.0988	2500
1986-05-05 18:00:00	51.3888	30.0988	2500	0	1.20163e-06	0	0	0	0	0	0	0	0	9.64824e-11	0	1986-05-05 21:00:00	51.3888	30.0988	3000
1986-05-05 21:00:00	51.3888	30.0988	0	3.94717e-05	0.00232245	0.0030952	6.83594e-05	0.544302	0.0544112	1.21362	0.127446	0.000368135	0.000612616	0.000982791	0.000361191	1986-05-06	51.3888	30.0988	500
1986-05-05 21:00:00	51.3888	30.0988	500	0	8.86012e-07	0	0	0	0	0	0	0	0	6.90414e-11	0	1986-05-06	51.3888	30.0988	1000
1986-05-05 21:00:00	51.3888	30.0988	1000	0.00181369	7.17062e-07	0	0	0	0	0	0	0	0	5.52706e-11	0	1986-05-06	51.3888	30.0988	1500
1986-05-05 21:00:00	51.3888	30.0988	1500	0	5.42604e-07	0	0	0	0	0	0	0	0	4.14748e-11	0	1986-05-06	51.3888	30.0988	2000
1986-05-05 21:00:00	51.3888	30.0988	2000	0	3.64039e-07	0	0.050123	0	0	0	0.0691578	0	0	2.76603e-11	0	1986-05-06	51.3888	30.0988	2500
1986-05-05 21:00:00	51.3888	30.0988	2500	0	1.82723e-07	0	0	0	0	0	0	0	0	1.38332e-11	0	1986-05-06	51.3888	30.0988	3000

## Sheet: Metadata
Posterior releases of 134Cs, 137Cs and 131I in kg per timestep (3 hours)
Cesium-134 (in kilogram per each size)				Cesium-137 (in kilogram per each size)				Iodine-131 (in kilograms per each size)
SIZE 1	SIZE 2	SIZE 3	SIZE 4	SIZE 1	SIZE 2	SIZE 3	SIZE 4	SIZE 1	SIZE 2	SIZE 3	SIZE 4
0.507676	0.335982	0.446984	0.389884	3.91363	11.5406	8.47945	2.83869	0.03274	0.0604083	0.145649	0.0461119
Total releases (in kg)
Cesium-134	Cesium-137	Iodine-131
1.68053	26.7724	0.284909
Total releases (in Bq)				Specific activities (in Bq per kg)
Cesium-134	Cesium-137	Iodine-131		Cesium-134	Cesium-137	Iodine-131
7.96569e+16	8.60732e+16	1.35275e+18		4.74e+16	3215000000000000	4.748e+18
