# Supplementary material for: Inverse modeling of the Chernobyl source term using atmospheric concentration and deposition measurements
Source: Copernicus journal article supplement (doi:10.5194/acp-17-8805-2017), 2017-07-20
Supplement: Supplementary file [file acp-17-8805-2017-supplement-title-page.pdf › acp-17-8805-2017-supplement-title-page.pdf]

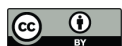

## *Supplement of*

# **Inverse modeling of the Chernobyl source term using atmospheric concentration and deposition measurements**

**Nikolaos Evangeliou et al.**

*Correspondence to:* Nikolaos Evangeliou ([nikolaos.evangeliou@nilu.no](mailto:nikolaos.evangeliou@nilu.no))

- [acp-17-8805-2017-supplement-title-page.pdf](#)
- [3.Suppl\\_IS.pdf](#)
- [Posterior\\_emissions.xlsx](#)

The copyright of individual parts of the supplement might differ from the CC BY 3.0 License.
